# Supplementary material
Source: publisher figshare collection journal article supplement (https://gsapubs.figshare.com/ndownloader/files/23305784)
Supplement: Supplementary file 1 [file 23305784]

## Sheet: DR1
Extended Data Table 1: Normalized Q-A-P (quartz-alkali feldspar-plagioclase feldspar) proportions for five UAE samples are displayed in the table on the right.
Sample	Q	A	P
UAE15	26	61	13
UAE388	32	36	32
UAE410	31	53	16
UAE413	32	52	16
UAE436	32	53	15

## Sheet: DR2
Extended Data Table 2: Locations and whole-rock (WR) δ18O. n.d. = not determined.
Name	Latitude	Longitude	Locality	WR δ18O	Qz δ18O	Zrn δ18O
UAE388	25.5016	56.3434	Al-Dadna	14.7	n.d.	16.9-18.4
UAE410	25.222	56.26	Bani Hamed	14.3	n.d.	19.3-24.9
UAE413	25.2303	56.2611	Bani Hamed	19.1	21.4	13.8-25.0
14-09	25.2206	56.2245	Al-Bithnah	17.8	21.9	18.4-20.0
14-19	25.2202	56.2263	Al-Bithnah	19.3	21.9	18.7-20.0
14-25	25.2163	56.2275	Al-Bithnah	18.8	19.8	14.0-25.1
UAE436	25.2127	56.2264	Al-Bithnah	n.d.	20.6	17.7-27.1
14-29	25.5011	56.3332	Wadi Zikt	16.1	n.d.	19.0-19.2
UAE15	25.2416	56.2527	Wadi Madhah	17.1	n.d.	16.2
13-31	23.5474	57.2054	Wadi Hajr	n.d.	n.d.	16.8-17.3

## Sheet: DR3
	EIMF		CMCA
	(sessions 1 and 2)		session 1		session 2
	Laura	91500	Laura	GJ-1	Penglai	Temora 2	BR266
wtd avg	5.4	10.1	5.3	6.2	5.2	8.2	13.1
2s	0.1	0.2	0.3	0.5	0.3	0.3	0.5
MSWD	0.9	0.6	0.2	0.1	0.4	0.2	0.9
n	77	19	17	6	14	18	8

## Sheet: DR4
Extended Data Table 4
Data collected at CMCA			Data collected at EIMF			Data collected at EIMF
Analysis name	δ18O	1s abs	Analysis name	δ18O	1s abs	Analysis name	δ18O	1s abs
14-25_@1	19	0.7	14-09@1	19.4	0.7	UAE413@1	16.2	0.6
14-25_@2	18.5	0.7	14-09@2	18.4	0.6	UAE413@2	22.9	0.9
14-25_@3	20.6	0.7	14-09@3	20	0.7	UAE413@3	15.6	0.6
14-25_@4	18.5	0.7	14-09@4	19.4	0.7	UAE413@4	21.5	0.7
14-25_@5	20.1	0.7	14-09@5	19.1	0.7	UAE413@5	14.1	0.5
14-25_@6	19.5	0.7	14-09@6	19.1	0.7	UAE413@6	16.4	0.7
14-25_@7	20.6	0.7	14-09-7-1	19.7	0.7	UAE413@7	14.7	0.5
14-25_@8	23.5	0.7	14-09-7-2	19.5	0.7	UAE413-8-1	15	0.6
14-25_@9	24.7	0.7	14-09@8	18.8	0.7	UAE413-8-2	15.9	0.6
14-25_@10	18.9	0.7	14-09@9	19.2	0.7	UAE413@9	15.1	0.5
14-25_@11	17.4	0.7	14-09@10	19.5	0.6	UAE413-10-2	13.8	0.5
14-25_@12	21.4	0.7	14-09@11	18.9	0.7	UAE413@11	23.7	1.1
14-25_@13	19.4	0.7	14-09@12	19	0.6	UAE413@12	18.6	0.8
14-25_@14	24	0.7	14-09@13	19.5	0.7	UAE413@13	15.5	0.6
14-25_@15	18.5	0.7	14-09@14	19.4	0.7	UAE413@14	17.3	0.6
			14-09@15	18.9	0.6	UAE413@15	18.7	0.7
14-29@1	19.1	0.7	14-09@16	18.8	0.6	UAE413-16-1	15.9	0.6
14-29@2	19.2	0.7	14-09@17	19.4	0.7	UAE413-16-2	15	0.8
14-29@3	19	0.7	14-09@18	19.5	0.7	UAE413@17	14.8	0.5
			14-09@19	18.7	0.6
13-31@01	16.9	0.7	14-09@20	19.6	0.7	UAE15@1	16.2	0.6
13-31@2	16.8	0.6	14-09@21	18.8	0.6
13-31@3	17.1	0.7	14-09@22	19.7	0.7	UAE388@1	18.4	0.6
13-31@4	17.3	0.7	14-09@23	18.8	0.6	UAE388@2	16.9	0.6
			14-09@24	19.2	0.7	UAE388@3	18.4	0.7
UAE436@1	26.8	0.7	14-09@25	19.4	0.6
UAE436@10	25.1	0.7	14-09@26	19.7	0.7	UAE410@1	19.3	0.7
UAE436@11	21.9	0.7				UAE410@2	24.9	0.9
UAE436@12	23.9	0.7	14-19@1	19.6	0.7
UAE436@13	20.1	0.7	14-19@2	18.9	0.6	UAE413@30	17.7	0.7
UAE436@14	23.3	0.7	14-19@3	20	0.7	UAE413@31	18.6	0.7
UAE436@15	18.8	0.7	14-19@4	19	0.6	UAE413@33	16	0.6
UAE436@16	23.9	0.7	14-19@5	18.7	0.6	UAE413@34	16.8	0.6
UAE436@17	24.8	0.7	14-19@6	19.6	0.7	UAE413@35	25	0.9
UAE436@18	18.8	0.7	14-19@7	18.7	0.7
UAE436@19	23.6	0.7	14-19@8	19	0.7
UAE436@2	17.7	0.7	14-19@9	18.9	0.7
UAE436@20	19.4	0.7	14-19@10	19.7	0.7
UAE436@21	22.7	0.7	14-19@11	19.5	0.7
UAE436@22	18.2	0.7	14-19@12	18.7	0.7
UAE436@23	19.9	0.7	14-19@13	18.9	0.6
UAE436@24	23.8	0.7	14-19@14	19.1	0.6
UAE436@3	27.1	0.7	14-19@15	20	0.8
UAE436@4	25.7	0.7	14-19@16	19.1	0.6
UAE436@5	27	0.7
UAE436@6	25	0.7	14-25-1	14	0.5
UAE436@7	18.7	0.7	14-25-2-1	22.8	0.8
UAE436@8	25.4	0.7	14-25-2-2	25.1	0.8
UAE436@9	19.8	0.7	14-25-3-1	24.5	0.8
`			14-25-3-2	18.8	0.6
			14-25-4-1	19.1	0.6
			14-25-4-2	18.4	0.6
			14-25-5	21.5	0.7

## Sheet: DR5 (EIMF-15um)
#	Date	Time	FileName	X	Y	18/16	% SE	16 cps	% SE	18 cps	% SE	δ18O	1s abs
	EIMF Session 1
1	2015-09-11	09:53:00	Laura@1	2479	-1025	0.00201493	0.0142528	1857091000	0.235445	3741913	0.237326	5.31676	0.308137
2	2015-09-11	09:57:00	Laura@2	2439	-1025	0.00201578	0.020352	1841853000	0.1651	3712816	0.170929	5.7413	0.343036
3	2015-09-11	10:02:00	Laura@3	2399	-1025	0.00201533	0.0138617	1898996000	0.155415	3826954	0.156357	5.51471	0.319086
4	2015-09-11	10:06:00	Laura@4	2359	-1025	0.00201519	0.0139675	1961212000	0.180714	3952212	0.185241	5.4433	0.315093
5	2015-09-11	10:11:00	Laura@5	2319	-1025	0.00201522	0.00914572	1971137000	0.0996837	3972196	0.100742	5.46119	0.310827
6	2015-09-11	10:15:00	Laura@6	2319	-985	0.00201592	0.018198	2023956000	0.316383	4080147	0.32473	5.8074	0.342927
7	2015-09-11	10:20:00	Laura@7	2359	-985	0.0020147	0.015312	1974455000	0.136935	3977923	0.133453	5.19863	0.302692
8	2015-09-11	10:24:00	Laura@8	2399	-985	0.00201499	0.0146389	1963980000	0.134331	3957434	0.137305	5.34675	0.310389
9	2015-09-11	10:29:00	Laura@9	2439	-985	0.00201632	0.0137533	1985408000	0.128496	4003169	0.124152	6.00976	0.347574
10	2015-09-11	10:33:00	Laura@10	2479	-985	0.00201486	0.0138443	1895610000	0.0516036	3820501	0.0577441	5.28076	0.305527
11	2015-09-11	11:52:00	Laura@11	2483	-950	0.00201567	0.0160475	1907137000	0.164879	3843736	0.162816	5.68177	0.331946
12	2015-09-11	11:57:00	Laura@12	2443	-950	0.00201467	0.011753	1907023000	0.140502	3841700	0.136434	5.18377	0.297508
13	2015-09-11	12:01:00	Laura@13	2403	-950	0.00201481	0.0110443	1955332000	0.110986	3939395	0.109312	5.25356	0.300773
14	2015-09-11	12:06:00	Laura@14	2363	-950	0.00201623	0.0170998	2011004000	0.21889	4054637	0.214768	5.96197	0.350092
15	2015-09-11	12:10:00	Laura@15	2323	-950	0.00201454	0.00932492	2024025000	0.139795	4077686	0.134677	5.12121	0.291625
16	2015-09-11	12:28:00	UAE413@1	-2115	-1243	0.00203675	0.00892933	2079532000	0.235745	4235495	0.236333	16.2022	0.554417
17	2015-09-11	12:33:00	UAE413@2	-2117	-1065	0.0020502	0.0140565	2425362000	0.22273	4973041	0.225008	22.9103	0.928452
18	2015-09-11	12:37:00	UAE413@3	-2299	-1051	0.00203549	0.0103874	2400141000	0.175102	4885461	0.173128	15.569	0.556518
19	2015-09-11	12:42:00	UAE413@4	-2534	-871	0.00204742	0.00743719	2359968000	0.156246	4831842	0.15491	21.5256	0.705183
20	2015-09-11	12:46:00	UAE413@5	-2537	-1100	0.00203254	0.00908392	2306831000	0.174961	4688242	0.1746	14.1	0.484771
21	2015-09-11	12:51:00	UAE413@6	-1817	-1105	0.00203716	0.0154532	2154887000	0.470734	4389434	0.459808	16.404	0.697346
22	2015-09-11	12:55:00	UAE413@7	-1704	-1086	0.00203368	0.0109111	2286888000	0.170126	4650845	0.164551	14.6696	0.534624
23	2015-09-11	13:00:00	UAE413-8-1	-1803	-872	0.00203436	0.0151142	2329646000	0.17964	4739519	0.177876	15.0093	0.630702
24	2015-09-11	13:04:00	UAE413-8-2	-1763	-873	0.00203625	0.010147	2306459000	0.164424	4696524	0.166757	15.9488	0.566731
25	2015-09-11	13:09:00	UAE413@9	-1750	-934	0.00203448	0.0106423	2349527000	0.231684	4780064	0.235118	15.0656	0.544244
27	2015-09-11	13:52:00	UAE413-10-2	-1653	-567	0.00203186	0.0124475	2287733000	0.114279	4648290	0.110687	13.7593	0.52785
28	2015-09-11	13:57:00	UAE413@11	-1815	-721	0.00205183	0.0119127	2304638000	0.151759	4728736	0.153129	23.7248	1.11112
29	2015-09-11	14:01:00	UAE413@12	-1924	-647	0.00204152	0.0143629	2234831000	0.164444	4562459	0.172497	18.5778	0.760817
30	2015-09-11	14:06:00	UAE413@13	-1816	-467	0.00203537	0.014183	2221597000	0.192048	4521780	0.191287	15.5128	0.631394
31	2015-09-11	14:10:00	UAE413@14	-1774	-445	0.00203899	0.0109921	2296149000	0.200589	4681920	0.198779	17.3154	0.632366
32	2015-09-11	14:15:00	UAE413@15	-1666	-363	0.0020418	0.0117397	2324821000	0.176561	4746815	0.178213	18.7173	0.701152
33	2015-09-11	14:19:00	UAE413-16-1	-1557	-174	0.00203607	0.0105867	2151802000	0.175182	4380983	0.175642	15.8599	0.5719
34	2015-09-11	14:24:00	UAE413-16-2	-1591	-125	0.00203436	0.0135424	2175574000	0.175762	4426213	0.171956	15.0066	0.780961
35	2015-09-11	14:28:00	UAE413@17	-1701	-166	0.00203398	0.0108594	2272842000	0.186763	4622905	0.184486	14.8155	0.539024
36	2015-09-11	15:55:00	Laura@1	1068	-788	0.00200855	0.0138399	2461951000	0.171724	4944978	0.180288	5.75148	0.400179
37	2015-09-11	16:00:00	Laura@2	1028	-788	0.00200824	0.0135341	2457420000	0.188025	4935087	0.189985	5.59274	0.387786
38	2015-09-11	16:04:00	Laura@3	988	-788	0.00200843	0.0115752	2449108000	0.189106	4918881	0.195331	5.69039	0.386399
39	2015-09-11	16:09:00	Laura@4	988	-828	0.00200859	0.0116257	2435759000	0.152014	4892442	0.154912	5.7685	0.391902
40	2015-09-11	16:13:00	Laura@5	1028	-828	0.00200767	0.0109674	2431348000	0.163811	4881344	0.167959	5.30682	0.358206
41	2015-09-11	16:21:00	Laura@6	-707	-1735	0.00200793	0.0152714	2419403000	0.184468	4858002	0.191439	5.43852	0.384863
42	2015-09-11	16:29:00	91500@2	757	757	0.00201699	0.0145759	2444267000	0.167523	4925952	0.156151	9.97667	0.350067
43	2015-09-11	16:37:00	91500@3	757	717	0.0020166	0.00864679	2445463000	0.210505	4931202	0.212314	9.77788	0.323338
44	2015-09-11	16:44:00	91500@4	797	717	0.00201785	0.0102185	2424589000	0.226344	4892799	0.230394	10.4043	0.348686
45	2015-09-11	16:51:00	91500@5	797	757	0.00201703	0.00883088	2425909000	0.217778	4893433	0.21831	9.9957	0.331027
46	2015-09-11	16:56:00	91500@6	837	717	0.00201745	0.00967188	2449240000	0.189452	4941757	0.19339	10.203	0.340281
47	2015-09-11	17:11:00	14-25-1	2652	-242	0.00202508	0.0164022	2354479000	0.239277	4768037	0.251606	14.0266	0.503354
48	2015-09-11	17:16:00	14-25-2-1	2781	-223	0.00204266	0.010142	2312322000	0.195105	4723550	0.196008	22.829	0.764553
49	2015-09-11	17:20:00	14-25-2-2	2823	-244	0.00204717	0.00628415	2297596000	0.171875	4703412	0.171532	25.0863	0.816072
50	2015-09-11	17:25:00	14-25-3-1	2511	-347	0.00204595	0.0127911	2290770000	0.203008	4686803	0.206638	24.4754	0.841598
51	2015-09-11	17:29:00	14-25-3-2	2508	-279	0.00203471	0.0107537	2307337000	0.164488	4694264	0.167555	18.8467	0.634769
52	2015-09-11	17:37:00	Laura@6	1080	-831	0.0020075	0.0122165	2411132000	0.181609	4840355	0.180627	5.2252	0.357152
53	2015-09-11	17:41:00	Laura@7	1080	-871	0.00200804	0.00830841	2393775000	0.195791	4806843	0.201587	5.4921	0.362275
54	2015-09-11	17:46:00	Laura@8	1040	-871	0.00200781	0.0114303	2395231000	0.174014	4809196	0.181752	5.37843	0.364688
55	2015-09-11	17:50:00	Laura@9	1000	-871	0.00200832	0.0115634	2389697000	0.184997	4799289	0.187098	5.63581	0.382647
56	2015-09-11	17:55:00	Laura@10	1000	-911	0.00200826	0.00949132	2379809000	0.187033	4779352	0.192659	5.60626	0.373368
57	2015-09-11	18:10:00	14-25-4-1	2530	312	0.00203518	0.0103245	2289877000	0.257452	4660287	0.268226	19.081	0.640094
58	2015-09-11	18:15:00	14-25-4-2	2502	300	0.00203382	0.0141341	2278757000	0.220035	4634897	0.229865	18.4035	0.642417
59	2015-09-11	18:19:00	14-25-5	2398	266	0.00203995	0.00758596	2265192000	0.133109	4620607	0.131728	21.474	0.704497
61	2015-09-11	18:28:00	14-09@1	2133	-1376	0.00203586	0.0100696	2225283000	0.148668	4530619	0.152635	19.4255	0.650144
62	2015-09-11	18:33:00	14-09@2	2162	-1497	0.0020339	0.0122384	2330647000	0.175701	4740670	0.176332	18.4406	0.630367
63	2015-09-11	18:37:00	14-09@3	2266	-1515	0.00203695	0.0176546	2253687000	0.358336	4590182	0.345149	19.9678	0.728328
64	2015-09-11	18:42:00	14-09@4	2110	-1595	0.00203584	0.0106454	2251435000	0.121532	4583929	0.127971	19.413	0.653175
65	2015-09-11	18:46:00	14-09@5	1919	-1471	0.00203529	0.0123778	2281621000	0.131377	4646693	0.123826	19.1406	0.655257
66	2015-09-11	18:51:00	14-09@6	1935	-1610	0.00203523	0.0164925	2228748000	0.171384	4536424	0.185085	19.1101	0.686567
67	2015-09-11	18:55:00	Laura@11	963	-913	0.00200784	0.0131079	2337174000	0.193459	4692267	0.19936	5.39495	0.372301
68	2015-09-11	19:00:00	Laura@12	963	-873	0.002007	0.0153648	2340983000	0.149859	4698366	0.154329	4.97434	0.352417
69	2015-09-11	19:04:00	Laura@13	963	-833	0.00200874	0.0120714	2348271000	0.172843	4716708	0.17652	5.84211	0.398716
70	2015-09-11	19:09:00	Laura@14	963	-793	0.00200903	0.0111803	2357534000	0.158487	4736351	0.159476	5.98832	0.405042
71	2015-09-11	19:13:00	Laura@15	923	-793	0.00200845	0.0101131	2351447000	0.184869	4722761	0.188869	5.6969	0.381483
72	2015-09-11	21:01:00	Laura@16	926	-840	0.00200864	0.0126963	2302379000	0.185008	4624964	0.185739	5.79504	0.398123
73	2015-09-11	21:06:00	Laura@17	926	-880	0.00200775	0.00936388	2290332000	0.180166	4598077	0.18171	5.34588	0.355641
74	2015-09-11	21:10:00	Laura@18	926	-920	0.00200812	0.0137472	2273741000	0.161091	4565617	0.170819	5.53165	0.384477
75	2015-09-11	21:15:00	Laura@19	886	-920	0.00200814	0.014391	2253904000	0.175882	4530232	0.182533	5.54217	0.388086
76	2015-09-11	21:19:00	Laura@20	886	-880	0.00200747	0.0188666	2264901000	0.308168	4546959	0.294339	5.21068	0.386392
77	2015-09-11	22:42:00	14-19@1	-2161	2118	0.00203625	0.0106918	2161624000	0.163741	4401369	0.16524	19.6198	0.660422
78	2015-09-11	22:46:00	14-19@2	-2202	1965	0.00203472	0.00897682	2177969000	0.154208	4431816	0.158992	18.8527	0.625082
79	2015-09-11	22:51:00	14-19@3	-2337	1980	0.00203699	0.0105632	2161199000	0.126817	4402684	0.132569	19.9908	0.6721
80	2015-09-11	22:56:00	14-19@4	-2357	1845	0.00203505	0.0078375	2151375000	0.131458	4377980	0.132917	19.0204	0.625125
81	2015-09-11	23:00:00	14-19@5	-2744	2074	0.00203443	0.0133382	2215313000	0.160858	4507276	0.169164	18.709	0.647194
82	2015-09-11	23:05:00	Laura@21	894	-847	0.00200747	0.0155815	2224105000	0.163992	4464817	0.166853	5.20618	0.369827
83	2015-09-11	23:09:00	Laura@22	894	-807	0.00200708	0.0111775	2242775000	0.22049	4501023	0.219077	5.0149	0.339192
84	2015-09-11	23:14:00	Laura@23	854	-807	0.00200712	0.0154189	2226589000	0.195601	4469446	0.205599	5.03092	0.356662
85	2015-09-11	23:22:00	Laura@24	854	-847	0.00200796	0.0153205	2235945000	0.186307	4489692	0.194076	5.45154	0.386016
86	2015-09-11	23:28:00	Laura@25	854	-887	0.00200718	0.0138798	2205260000	0.185425	4426190	0.186472	5.06197	0.352365
87	2015-09-11	23:42:00	91500@7	731	663	0.00201646	0.0128678	2223991000	0.202706	4484584	0.200358	9.70978	0.334153
88	2015-09-11	23:47:00	91500@8	771	663	0.0020169	0.0110809	2214981000	0.195226	4467077	0.200982	9.9281	0.335437
89	2015-09-11	23:51:00	91500@9	811	663	0.00201662	0.0104852	2237087000	0.206637	4511363	0.209428	9.7909	0.328934
90	2015-09-11	23:56:00	91500@10	851	663	0.00201781	0.00984758	2240757000	0.167417	4521424	0.171409	10.3848	0.346876
91	2015-10-11	00:00:00	91500@11	891	663	0.00201705	0.00885075	2241704000	0.184827	4521626	0.185503	10.0057	0.331412
92	2015-10-11	00:09:00	Laura@26	856	-928	0.00200635	0.0105812	2161356000	0.184937	4336031	0.182566	4.64636	0.312477
93	2015-10-11	00:14:00	Laura@27	856	-968	0.00200767	0.0154407	2159557000	0.190156	4335288	0.185115	5.30582	0.376252
94	2015-10-11	00:18:00	Laura@28	896	-968	0.00200695	0.0109715	2162494000	0.18427	4339731	0.184578	4.9493	0.334086
95	2015-10-11	00:23:00	Laura@29	936	-968	0.00200614	0.00907761	2165145000	0.184025	4344220	0.183655	4.54471	0.301619
96	2015-10-11	00:27:00	Laura@30	976	-968	0.00200805	0.011099	2186213000	0.175182	4389775	0.178233	5.4981	0.37159
97	2015-10-11	00:35:00	Laura@31	1136	-808	0.00200762	0.0160867	2192967000	0.241396	4402433	0.249253	5.28229	0.377605
98	2015-10-11	00:40:00	Laura@32	1136	-848	0.00200681	0.00980366	2196200000	0.173116	4407792	0.175873	4.8777	0.325728
99	2015-10-11	00:45:00	Laura@33	1136	-888	0.0020069	0.0123601	2192464000	0.188303	4400347	0.185109	4.92226	0.336953
100	2015-10-11	00:49:00	Laura@34	1176	-888	0.00200737	0.0115084	2174817000	0.181107	4365395	0.18489	5.1556	0.349851
101	2015-10-11	00:54:00	Laura@35	1176	-848	0.00200678	0.0104627	2186352000	0.171562	4387174	0.17252	4.86367	0.326731
102	2015-10-11	01:27:00	14-09-7-1	2373	-1264	0.00203645	0.0106301	2203642000	0.0552932	4487857	0.0579533	19.722	0.663475
103	2015-10-11	01:31:00	14-09-7-2	2429	-1239	0.00203594	0.0118415	2194042000	0.271862	4466923	0.269802	19.4616	0.662542
104	2015-10-11	01:36:00	14-09@8	2498	-1299	0.0020346	0.0140434	2204889000	0.194648	4486395	0.196865	18.7906	0.655241
105	2015-10-11	01:40:00	14-09@9	2678	-1357	0.00203545	0.0224534	2247709000	0.428652	4575028	0.410907	19.2182	0.749979
106	2015-10-11	01:45:00	14-09@10	2926	-1293	0.00203594	0.00981233	2197759000	0.0880341	4474028	0.0893471	19.4621	0.649879
107	2015-10-11	01:49:00	14-09@11	2627	-1554	0.0020349	0.0149944	2197210000	0.0776061	4469336	0.0768399	18.9428	0.668008
108	2015-10-11	01:54:00	14-09@12	2580	-1698	0.00203498	0.0109504	2241778000	0.149741	4562258	0.153583	18.9829	0.640558
109	2015-10-11	01:59:00	Laura@36	1187	-796	0.00200865	0.0153745	2260760000	0.199979	4541083	0.205266	5.79905	0.410894
110	2015-10-11	02:03:00	Laura@37	1227	-796	0.00200779	0.0128145	2253815000	0.17697	4525186	0.175861	5.36841	0.369284
111	2015-10-11	02:08:00	Laura@38	1227	-836	0.00200787	0.0150808	2255846000	0.150593	4529443	0.151651	5.40747	0.381781
112	2015-10-11	02:12:00	Laura@39	1227	-876	0.0020078	0.0119589	2262622000	0.169168	4542553	0.168172	5.37442	0.366371
113	2015-10-11	02:17:00	Laura@40	1267	-876	0.00200722	0.011315	2249647000	0.164423	4515186	0.163248	5.0825	0.344228
114	2015-10-11	02:36:00	91500@12	736	624	0.00201659	0.0114054	2242844000	0.15651	4522895	0.160811	9.77337	0.331262
115	2015-10-11	02:41:00	91500@13	776	624	0.00201643	0.0119368	2251771000	0.192995	4545061	0.209106	9.69375	0.330333
116	2015-10-11	02:45:00	91500@14	816	624	0.00201705	0.0115051	2257885000	0.204422	4554534	0.202171	10.0062	0.339492
117	2015-10-11	02:50:00	91500@15	856	624	0.00201826	0.0109122	2251522000	0.173701	4544163	0.172569	10.6131	0.357997
118	2015-10-11	02:54:00	91500@16	896	624	0.00201771	0.00915578	2249710000	0.162966	4539519	0.166824	10.3382	0.34328
119	2015-10-11	03:44:00	Laura@41	1220	-912	0.00200881	0.0163967	2220692000	0.21981	4460948	0.216409	5.88067	0.422033
120	2015-10-11	03:49:00	Laura@42	1260	-912	0.00200697	0.0103189	2219237000	0.151205	4453564	0.150204	4.95681	0.332547
121	2015-10-11	03:53:00	Laura@43	1300	-912	0.00200765	0.012133	2211850000	0.176201	4440918	0.181941	5.29681	0.361731
122	2015-10-11	03:58:00	Laura@44	1340	-912	0.00200793	0.0108161	2211811000	0.21244	4440902	0.218729	5.43702	0.366462
123	2015-10-11	04:02:00	Laura@45	1380	-912	0.00200782	0.0122299	2207898000	0.149225	4433070	0.153125	5.38444	0.368087
124	2015-10-11	04:32:00	Laura@46	1381	-952	0.00200896	0.010326	2186824000	0.13265	4393602	0.132203	5.95177	0.399323
125	2015-10-11	04:37:00	Laura@47	1341	-952	0.00200765	0.0123502	2182843000	0.127101	4382376	0.126327	5.29681	0.362555
126	2015-10-11	04:41:00	Laura@48	1301	-952	0.00200778	0.00767447	2186731000	0.141321	4390657	0.140104	5.36191	0.352036
127	2015-10-11	04:46:00	Laura@49	1261	-952	0.00200893	0.0155041	2196359000	0.14148	4412343	0.143763	5.94125	0.421641
128	2015-10-11	04:50:00	Laura@50	1221	-952	0.00200656	0.0122362	2195748000	0.138165	4405920	0.138786	4.75001	0.324738
129	2015-10-11	04:55:00	14-09@13	2182	-1802	0.00203596	0.0139997	2092005000	0.41406	4259097	0.417532	19.4766	0.678819
130	2015-10-11	04:59:00	14-09@14	2554	-2084	0.00203584	0.0141707	2065455000	0.106129	4204599	0.111868	19.4145	0.677996
131	2015-10-11	05:04:00	14-09@15	2504	-1969	0.00203483	0.0106944	2100495000	0.147247	4273957	0.150623	18.9068	0.636435
132	2015-10-11	05:08:00	14-09@16	2578	-1948	0.00203469	0.00969321	2117209000	0.103634	4307534	0.109734	18.8382	0.628389
133	2015-10-11	05:13:00	14-09@17	2731	-1857	0.00203582	0.0120403	2030256000	0.149117	4133081	0.150999	19.402	0.661865
134	2015-10-11	05:18:00	14-09@18	2702	-1714	0.00203607	0.0118762	2154500000	0.10446	4386498	0.106692	19.5277	0.665029
135	2015-10-11	05:22:00	14-09@19	2620	-1678	0.00203444	0.011556	2196552000	0.142365	4468780	0.149779	18.711	0.635151
136	2015-10-11	05:27:00	14-09@20	2838	-1746	0.00203615	0.0148958	2138560000	0.103284	4354436	0.111297	19.5697	0.689297
137	2015-10-11	05:31:00	14-09@21	2911	-1732	0.00203453	0.00907067	2113148000	0.140607	4299516	0.140783	18.758	0.622423
138	2015-10-11	05:36:00	14-09@22	3068	-1751	0.00203646	0.0135409	2151272000	0.154248	4380998	0.162318	19.7265	0.683943
139	2015-10-11	05:40:00	14-09@23	3033	-1661	0.00203457	0.00922311	2103375000	0.171535	4279672	0.172923	18.7786	0.623893
140	2015-10-11	05:45:00	14-09@24	2778	-1472	0.00203532	0.0126291	2205954000	0.100733	4490338	0.105478	19.1541	0.657475
141	2015-10-11	05:49:00	14-09@25	2856	-1440	0.00203575	0.00989404	2152931000	0.191277	4382546	0.197401	19.3709	0.647302
142	2015-10-11	05:54:00	14-09@26	2940	-1454	0.00203648	0.0137051	2141792000	0.132651	4361727	0.133289	19.7365	0.685562
143	2015-10-11	05:58:00	Laura@51	1219	-1002	0.00200773	0.0116784	2190681000	0.159478	4398629	0.156468	5.33587	0.362703
144	2015-10-11	06:03:00	Laura@52	1179	-1002	0.00200772	0.0132709	2184434000	0.141064	4385719	0.140811	5.33086	0.368542
145	2015-10-11	06:07:00	Laura@53	1139	-1002	0.00200742	0.0141095	2222961000	0.117693	4462150	0.114841	5.18214	0.361686
146	2015-10-11	06:12:00	Laura@54	1099	-1002	0.002009	0.0115195	2190387000	0.127725	4400239	0.129405	5.97631	0.405588
147	2015-10-11	06:17:00	Laura@55	1059	-1002	0.00200758	0.0084032	2193093000	0.173155	4403133	0.1767	5.26526	0.347565
148	2015-10-11	07:24:00	14-19@6	-2476	1644	0.00203621	0.0185365	2077039000	0.361058	4228189	0.343742	19.5978	0.723354
149	2015-10-11	07:28:00	14-19@7	-2411	1188	0.00203443	0.0239338	2105132000	0.290135	4282706	0.272294	18.7095	0.746405
150	2015-10-11	07:33:00	14-19@8	-2343	1227	0.00203502	0.0155819	2125833000	0.156285	4326109	0.159982	19.0019	0.674913
151	2015-10-11	07:38:00	14-19@9	-2280	1234	0.00203483	0.0159484	2097493000	0.0655259	4268075	0.0682071	18.9058	0.674567
152	2015-10-11	07:42:00	14-19@10	-2181	1303	0.0020364	0.0126439	2062172000	0.108967	4199413	0.11358	19.6949	0.676145
153	2015-10-11	07:47:00	14-19@11	-2032	1328	0.00203608	0.0143325	2136619000	0.120879	4350272	0.129282	19.5342	0.683464
154	2015-10-11	07:51:00	14-19@12	-2422	899	0.00203432	0.0162393	2122310000	0.123862	4317472	0.129264	18.6549	0.668059
155	2015-10-11	07:56:00	14-19@13	-2407	1009	0.00203486	0.0106444	2153254000	0.129398	4382004	0.136491	18.9213	0.636625
156	2015-10-11	08:00:00	14-19@14	-2249	1038	0.00203524	0.0111525	2169063000	0.20886	4414294	0.208918	19.1116	0.646165
157	2015-10-11	08:05:00	14-19@15	-2511	994	0.0020371	0.0227848	2081446000	0.543195	4239488	0.524015	20.0464	0.78614
158	2015-10-11	08:09:00	14-19@16	-2819	712	0.00203522	0.0102389	2122702000	0.14622	4319887	0.147579	19.1035	0.640348
159	2015-10-11	08:14:00	Laura@56	854	-1006	0.00200803	0.0137419	2111938000	0.220089	4240851	0.228866	5.48909	0.381496
160	2015-10-11	08:19:00	Laura@57	894	-1006	0.00200787	0.0124383	2120485000	0.195087	4257661	0.200167	5.40697	0.37044
161	2015-10-11	08:23:00	Laura@58	934	-1006	0.00200682	0.0131324	2127590000	0.15511	4269590	0.156569	4.8837	0.337111
162	2015-10-11	08:28:00	Laura@59	974	-1006	0.00200804	0.0118877	2135773000	0.1743	4288727	0.175199	5.4956	0.374357
163	2015-10-11	08:32:00	Laura@60	1014	-1006	0.00200865	0.0153874	2130934000	0.151116	4280307	0.155807	5.79905	0.410959
164	2015-10-11	08:37:00	91500@17	934	670	0.00201759	0.0116406	2167203000	0.122395	4372056	0.126565	10.2771	0.349157
165	2015-10-11	08:41:00	91500@18	935	631	0.00201793	0.0138687	2168526000	0.116227	4375630	0.124358	10.4469	0.363558
166	2015-10-11	08:46:00	91500@19	975	631	0.00201747	0.0133307	2192661000	0.165368	4423643	0.169313	10.218	0.353439
167	2015-10-11	08:50:00	91500@20	935	591	0.00201741	0.0104122	2158841000	0.182872	4355535	0.181753	10.188	0.342043
	EIMF Session 2
1	11/13/15	08:51:00	Laura@310	-1066	904	0.00200924	0.0145434	2403911000	0.153015	4830031	0.148174	5.03209	0.351133
2	11/13/15	08:55:00	Laura@311	-1106	904	0.00200953	0.0128844	2399885000	0.0751008	4823081	0.0741337	5.17515	0.359425
3	11/13/15	09:00:00	Laura@312	-1146	904	0.00200968	0.0114069	2388585000	0.128275	4800001	0.123207	5.25318	0.363484
4	11/13/15	09:04:00	Laura@313	-1146	864	0.002011	0.0114337	2392790000	0.163083	4811595	0.165557	5.91045	0.408989
5	11/13/15	09:09:00	Laura@314	-1106	864	0.00201051	0.0139036	2392165000	0.175709	4809475	0.178972	5.66635	0.394653
7	11/13/15	09:37:00	UAE413@30	133	-1648	0.00203454	0.0112133	2277677000	0.102886	4634019	0.0993647	17.6858	0.651003
8	11/13/15	09:41:00	UAE413@31	527	-1655	0.00203645	0.0098566	2379219000	0.12416	4845448	0.122893	18.6422	0.656614
10	11/13/15	09:50:00	UAE413@33	1071	-1473	0.00203122	0.0129028	2308714000	0.183334	4689156	0.179102	16.0246	0.624324
11	11/13/15	09:55:00	UAE413@34	1112	-1505	0.00203279	0.00881426	2292453000	0.199294	4660071	0.206401	16.8129	0.573304
12	11/13/15	09:59:00	UAE413@35	-371	-1986	0.00204916	0.0114254	2205986000	0.150821	4520109	0.150249	24.9993	0.926707
13	11/13/15	10:04:00	UAE388@1	-1473	-1099	0.00203597	0.00769928	2317284000	0.163697	4717916	0.161268	18.4011	0.607261
14	11/13/15	10:08:00	UAE388@2	-1478	-1131	0.00203298	0.0122903	2260065000	0.171458	4595074	0.169798	16.9079	0.645207
15	11/13/15	10:13:00	UAE388@3	-1465	-1177	0.00203596	0.0129387	2312667000	0.1528	4708180	0.153522	18.3961	0.717591
16	11/13/15	10:17:00	UAE15@1	-2233	1740	0.00203164	0.0117347	2442902000	0.0811286	4962748	0.0844204	16.2362	0.608108
17	11/13/15	10:44:00	Laura@315	-1008	899	0.00200955	0.0176236	2386309000	0.119547	4798345	0.129534	5.18415	0.365406
18	11/13/15	10:49:00	Laura@316	-968	899	0.00201104	0.0109662	2390227000	0.148929	4806487	0.148194	5.93346	0.410134
19	11/13/15	10:53:00	Laura@317	-928	899	0.0020101	0.0143497	2388121000	0.111018	4800744	0.121242	5.46377	0.381034
20	11/13/15	10:58:00	Laura@318	-928	859	0.00200976	0.0101322	2399923000	0.114171	4822833	0.11378	5.2892	0.364927
21	11/13/15	11:02:00	Laura@319	-968	859	0.00200886	0.0104075	2420690000	0.117024	4863125	0.115459	4.84001	0.334132
22	11/13/15	11:47:00	UAE410@1	-396	3555	0.00203769	0.0110841	2415912000	0.196322	4923184	0.19702	19.2629	0.706035
23	11/13/15	11:51:00	UAE410@2	-146	3715	0.00204894	0.0114286	2333097000	0.107524	4780389	0.11269	24.8912	0.922799
24	11/13/15	11:56:00	Laura@320	-888	899	0.00200875	0.00824397	2393531000	0.143246	4807756	0.145825	4.78649	0.329038
25	11/13/15	12:00:00	Laura@321	-888	859	0.00200944	0.0103075	2406769000	0.144332	4836517	0.142544	5.13063	0.354119
26	11/13/15	12:05:00	Laura@322	-848	859	0.00201029	0.0133364	2386997000	0.178056	4798206	0.186042	5.55681	0.386407
27	11/13/15	12:09:00	Laura@323	-848	899	0.00200928	0.0131753	2409765000	0.138363	4841903	0.139016	5.0536	0.351255
28	11/13/15	12:14:00	Laura@324	-808	899	0.00200963	0.0117636	2400193000	0.122935	4823253	0.114748	5.22467	0.361824

## Sheet: DR5 (CMCA-15um)
		RAW DATA from CIPS		Drift corrected ratios		SIMS corrected ratios
#	Analysis name	18O/16O	1s rel.%	18O/16O	1s abs	18/16O	1s abs	δ18O	1s abs
	CMCA Session 1
1	Laura@01	0.00201759	0.00774004	0.00201986	1.56448e-07	0.002015	6.52129e-07	4.8852	0.650438
2	Laura@2	0.00201819	0.0104996	0.00202038	2.12112e-07	0.00201551	6.67754e-07	5.1438	0.666023
3	Laura@3	0.00201799	0.00965939	0.0020201	1.95155e-07	0.00201524	6.62504e-07	5.00489	0.660786
4	Laura@4	0.00201885	0.00842651	0.00202087	1.70381e-07	0.00201601	6.55901e-07	5.38886	0.6542
5	Laura@5	0.00201858	0.00895408	0.00202052	1.80992e-07	0.00201566	6.58618e-07	5.21413	0.65691
6	Laura@6	0.00201826	0.00665029	0.00202011	1.34552e-07	0.00201524	6.47326e-07	5.00905	0.645647
7	Laura@7	0.00201958	0.00903471	0.00202134	1.82708e-07	0.00201648	6.59337e-07	5.62436	0.657628
8	Laura@8	0.00201914	0.00685812	0.00202082	1.38797e-07	0.00201596	6.48436e-07	5.36555	0.646755
9	GJ1@1	0.00202086	0.00741092	0.00202246	1.50062e-07	0.00201759	6.51427e-07	6.17887	0.649738
10	14-25_@1	0.00204671	0.00691883	0.00204823	1.41923e-07	0.00204329	6.57495e-07	18.9979	0.65579
11	14-25_@2	0.00204571	0.00886566	0.00204714	1.81612e-07	0.00204221	6.66815e-07	18.4585	0.665086
12	14-25_@3	0.00205015	0.00885601	0.0020515	1.81808e-07	0.00204656	6.68183e-07	20.6275	0.666451
13	14-25_@4	0.00204604	0.00788766	0.00204731	1.61661e-07	0.00204238	6.61735e-07	18.5404	0.660019
14	Laura@9	0.00201953	0.00646426	0.00202071	1.30889e-07	0.00201585	6.46763e-07	5.3092	0.645086
15	Laura@10	0.00202099	0.00809971	0.00202209	1.63967e-07	0.00201722	6.54642e-07	5.99516	0.652945
16	GJ1@2	0.00202176	0.00796234	0.00202277	1.61257e-07	0.0020179	6.54179e-07	6.33435	0.652483
17	14-25_@5	0.00204943	0.00754581	0.00205036	1.54935e-07	0.00204542	6.61061e-07	20.0579	0.659347
18	14-25_@6	0.00204848	0.00993398	0.00204932	2.03715e-07	0.00204439	6.73793e-07	19.5443	0.672046
19	14-25_@7	0.00205063	0.00748214	0.00205139	1.53722e-07	0.00204645	6.61094e-07	20.5721	0.65938
20	14-25_@8	0.00205668	0.00875532	0.00205736	1.80317e-07	0.0020524	6.69549e-07	23.5406	0.667813
21	14-25_@9	0.00205906	0.00913934	0.00205965	1.88421e-07	0.00205469	6.72456e-07	24.6797	0.670712
22	Laura@11	0.00201998	0.010684	0.00202048	2.16022e-07	0.00201562	6.69032e-07	5.19593	0.667297
24	GJ1@3	0.00202277	0.00907033	0.00202311	1.83715e-07	0.00201824	6.60147e-07	6.50216	0.658436
25	14-25_@10	0.00204784	0.00715721	0.00204809	1.46872e-07	0.00204316	6.58534e-07	18.9302	0.656827
30	Laura@13	0.0020214	0.00794098	0.00202124	1.60797e-07	0.00201637	6.536e-07	5.57071	0.651905
31	Laura@14	0.00202158	0.00767192	0.00202133	1.55382e-07	0.00201646	6.52324e-07	5.61737	0.650632
32	GJ1@4	0.00202274	0.00756865	0.00202241	1.53386e-07	0.00201754	6.52181e-07	6.15258	0.65049
33	14-29@1	0.00204877	0.00576634	0.00204835	1.18517e-07	0.00204342	6.52904e-07	19.0602	0.651211
34	14-29@2	0.00204922	0.00589288	0.00204871	1.21127e-07	0.00204378	6.53493e-07	19.2412	0.651798
35	14-29@3	0.00204888	0.0102483	0.00204829	2.10187e-07	0.00204336	6.75459e-07	19.0286	0.673708
38	Laura@15	0.00202217	0.0107242	0.00202133	2.17068e-07	0.00201646	6.6962e-07	5.61713	0.667883
39	Laura@16	0.00202134	0.00807885	0.00202041	1.63574e-07	0.00201555	6.54035e-07	5.16082	0.652339
40	GJ1@5	0.0020233	0.00561429	0.00202229	1.13987e-07	0.00201742	6.44059e-07	6.09652	0.642389
47	Laura@17	0.00202221	0.00709124	0.00202061	1.43711e-07	0.00201574	6.49434e-07	5.2565	0.64775
49	14-25_@11	0.00204672	0.00736076	0.00204495	1.5095e-07	0.00204003	6.58494e-07	17.369	0.656786
50	14-25_@12	0.00205496	0.00789186	0.00205311	1.6245e-07	0.00204816	6.6369e-07	21.426	0.661969
51	14-25_@13	0.00205102	0.00899102	0.00204908	1.8465e-07	0.00204415	6.68229e-07	19.4235	0.666496
52	14-25_@14	0.0020603	0.00687211	0.00205828	1.41901e-07	0.00205332	6.60568e-07	23.9989	0.658855
53	14-25_@15	0.00204927	0.00858235	0.00204716	1.76129e-07	0.00204223	6.65356e-07	18.4685	0.66363
54	Laura@18	0.00202176	0.00627543	0.00201957	1.27226e-07	0.00201471	6.45684e-07	4.74134	0.64401
55	GJ1@6	0.00202447	0.00691104	0.00202219	1.4023e-07	0.00201732	6.49162e-07	6.04569	0.647478
	CMCA Session 2
1	Tem2@01	0.00202677	0.00868716	0.00202789	1.76184e-07	0.00202143	6.57172e-07	8.09241	0.655468
2	Tem2@02	0.0020278	0.00917036	0.00202889	1.86066e-07	0.00202242	6.60173e-07	8.58959	0.658461
3	Tem2@03	0.00202726	0.00674714	0.00202832	1.3693e-07	0.00202185	6.47945e-07	8.3058	0.646265
4	Tem2@04	0.00202774	0.00630233	0.00202877	1.27953e-07	0.00202231	6.46257e-07	8.53055	0.644582
5	Tem2@05	0.00202588	0.00680955	0.00202689	1.38101e-07	0.00202043	6.47756e-07	7.59604	0.646076
6	PL@1	0.00202189	0.00588358	0.00202287	1.1913e-07	0.00201642	6.42768e-07	5.5972	0.641101
7	PL@2	0.00202183	0.00794428	0.00202278	1.60746e-07	0.00201634	6.51682e-07	5.55401	0.649992
8	UAE436@12	0.00205976	0.00822159	0.0020597	1.69465e-07	0.00205314	6.65019e-07	23.9087	0.663294
9	UAE436@13	0.0020522	0.00818933	0.002052	1.68182e-07	0.00204547	6.62369e-07	20.0817	0.660652
10	BR266@1	0.00203712	0.00722851	0.00203798	1.47391e-07	0.00203149	6.53163e-07	13.1123	0.651469
11	UAE436@14	0.00205868	0.0071827	0.00205846	1.48006e-07	0.0020519	6.59532e-07	23.2912	0.657822
12	UAE436@15	0.00204967	0.00611027	0.00204942	1.25402e-07	0.00204289	6.52089e-07	18.7978	0.650398
13	13-31@01	0.00204487	0.00919986	0.00204565	1.88233e-07	0.00203914	6.65805e-07	16.9244	0.664078
14	Tem2@06	0.0020278	0.00686561	0.00202856	1.39367e-07	0.0020221	6.48534e-07	8.42578	0.646853
15	Tem2@07	0.00202675	0.00796026	0.00202747	1.6146e-07	0.00202102	6.53278e-07	7.88747	0.651584
16	PL@3	0.00202087	0.0113309	0.00202157	2.29071e-07	0.00201513	6.71325e-07	4.95256	0.669584
17	PL@4	0.00202162	0.00856703	0.00202229	1.7331e-07	0.00201585	6.54727e-07	5.31055	0.653029
18	13-31@2	0.00204477	0.00551381	0.00204541	1.12924e-07	0.00203889	6.48585e-07	16.8029	0.646904
19	13-31@3	0.00204537	0.00782929	0.00204599	1.60265e-07	0.00203947	6.58593e-07	17.0903	0.656885
20	BR266@2	0.00203961	0.00788352	0.00204019	1.60919e-07	0.0020337	6.56997e-07	14.2111	0.655293
21	13-31@4	0.00204576	0.00685609	0.00204631	1.40404e-07	0.0020398	6.54172e-07	17.253	0.652476
22	UAE436@1	0.00206499	0.00952038	0.00206552	1.96698e-07	0.00205894	6.74165e-07	26.8001	0.672417
23	UAE436@2	0.00204666	0.0084016	0.00204716	1.7207e-07	0.00204064	6.619e-07	17.6737	0.660183
24	Tem2@08	0.00202853	0.0124169	0.002029	2.51961e-07	0.00202254	6.81583e-07	8.64861	0.679815
25	Tem2@09	0.00202637	0.00933448	0.00202682	1.89259e-07	0.00202036	6.60456e-07	7.56248	0.658743
26	PL@5	0.00202259	0.00810852	0.00202301	1.64126e-07	0.00201657	6.52589e-07	5.66903	0.650897
27	PL@6	0.00202221	0.00701833	0.0020226	1.42068e-07	0.00201616	6.47301e-07	5.46378	0.645622
28	UAE436@3	0.00206581	0.0075062	0.00206617	1.55194e-07	0.00205959	6.63512e-07	27.1231	0.661792
29	UAE436@4	0.00206301	0.00662824	0.00206335	1.3689e-07	0.00205677	6.58635e-07	25.7203	0.656927
30	BR266@3	0.00203643	0.00711105	0.00203674	1.44952e-07	0.00203025	6.5224e-07	12.4917	0.650549
31	UAE436@5	0.00206568	0.00679517	0.00206596	1.40511e-07	0.00205938	6.60189e-07	27.0194	0.658477
32	UAE436@6	0.00206157	0.00879313	0.00206182	1.81388e-07	0.00205525	6.68774e-07	24.9619	0.66704
33	UAE436@7	0.00204893	0.00918683	0.00204915	1.88339e-07	0.00204262	6.66882e-07	18.6621	0.665153
34	Tem2@10	0.00202791	0.0109913	0.00202811	2.22985e-07	0.00202165	6.71213e-07	8.20381	0.669472
35	Tem2@11	0.00202765	0.00689076	0.00202782	1.39866e-07	0.00202136	6.48415e-07	8.05772	0.646734
36	PL@7	0.00202255	0.00587979	0.00202269	1.19092e-07	0.00201624	6.42706e-07	5.50759	0.641039
37	PL@8	0.00202117	0.00625977	0.00202128	1.26681e-07	0.00201485	6.43717e-07	4.8102	0.642047
38	UAE436@8	0.00206254	0.00808013	0.00206263	1.66778e-07	0.00205606	6.65228e-07	25.362	0.663503
39	UAE436@9	0.00205135	0.0108241	0.0020514	2.22132e-07	0.00204487	6.77803e-07	19.7839	0.676045
40	BR266@4	0.00203801	0.00817001	0.00203803	1.66627e-07	0.00203154	6.57757e-07	13.1371	0.656051
41	UAE436@10	0.00206205	0.00761802	0.00206205	1.57216e-07	0.00205548	6.62734e-07	25.0743	0.661016
42	UAE436@11	0.00205565	0.00619381	0.00205563	1.27483e-07	0.00204908	6.54391e-07	21.8829	0.652694
43	Tem2@12	0.00202867	0.00602872	0.00202859	1.22469e-07	0.00202213	6.45145e-07	8.44056	0.643472
44	Tem2@13	0.00202812	0.00722487	0.00202801	1.46667e-07	0.00202155	6.49965e-07	8.15279	0.64828
45	PL@9	0.00202039	0.0068234	0.00202025	1.38007e-07	0.00201382	6.45712e-07	4.29872	0.644038
46	PL@10	0.00202196	0.00671007	0.00202179	1.35824e-07	0.00201535	6.45721e-07	5.06235	0.644047
47	BR266@5	0.00203883	0.00693979	0.00203855	1.41634e-07	0.00203206	6.52068e-07	13.3933	0.650377
48	UAE436@16	0.00205994	0.00755938	0.00205963	1.55849e-07	0.00205307	6.6168e-07	23.8735	0.659964
49	UAE436@17	0.00206185	0.00819604	0.00206152	1.6911e-07	0.00205495	6.65477e-07	24.8101	0.663751
50	UAE436@18	0.0020497	0.00900529	0.00204933	1.84691e-07	0.00204281	6.65923e-07	18.7543	0.664196
51	UAE436@19	0.00205946	0.00684872	0.00205907	1.4119e-07	0.00205251	6.58231e-07	23.5933	0.656524
52	UAE436@20	0.00205106	0.0100454	0.00205064	2.06136e-07	0.00204411	6.72535e-07	19.4037	0.670791
53	Tem2@14	0.00202934	0.00547414	0.0020289	1.11272e-07	0.00202243	6.43222e-07	8.59497	0.641554
54	Tem2@15	0.00202849	0.0118084	0.00202802	2.39617e-07	0.00202156	6.76858e-07	8.15907	0.675103
55	PL@11	0.00202147	0.00657122	0.00202097	1.32988e-07	0.00201453	6.44884e-07	4.65447	0.643211
56	PL@12	0.00202281	0.00803234	0.00202228	1.62604e-07	0.00201584	6.5199e-07	5.30724	0.650299
57	UAE436@21	0.00205783	0.00650795	0.00205728	1.34074e-07	0.00205072	6.56203e-07	22.7023	0.654501
58	UAE436@22	0.00204886	0.00955071	0.00204828	1.95785e-07	0.00204175	6.68749e-07	18.2284	0.667014
59	UAE436@23	0.00205231	0.00590465	0.0020517	1.21349e-07	0.00204516	6.52025e-07	19.9286	0.650334
60	Tem2@20	0.00202843	0.00625462	0.00202779	1.27031e-07	0.00202133	6.45777e-07	8.0446	0.644103
61	BR266@6	0.0020368	0.00611443	0.00203613	1.24701e-07	0.00202964	6.47882e-07	12.1906	0.646202
62	UAE436@24	0.00206014	0.00646204	0.00205944	1.33279e-07	0.00205288	6.56705e-07	23.7799	0.655002
63	Tem2@16	0.0020286	0.00855797	0.00202779	1.73724e-07	0.00202134	6.56494e-07	8.04696	0.654791
64	Tem2@17	0.00202906	0.00918941	0.00202822	1.86568e-07	0.00202176	6.60115e-07	8.26078	0.658403
65	PL@13	0.00202244	0.0133183	0.00202157	2.69431e-07	0.00201513	6.86054e-07	4.95453	0.684275
66	PL@14	0.00202276	0.00745799	0.00202187	1.50992e-07	0.00201543	6.49083e-07	5.10124	0.6474
67	BR266@7	0.00203974	0.00561402	0.00203876	1.14688e-07	0.00203227	6.4685e-07	13.4982	0.645172
68	BR266@8	0.00203852	0.00864618	0.00203732	1.76369e-07	0.00203083	6.6006e-07	12.7814	0.658349

## Sheet: DR5 (CMCA-3um)
		RAW DATA from CIPS			Drift corrected ratios		SIMS corrected ratios
#	Analysis name	18O/16O	1s rel.%	16O1H/16O	18O/16O	1s abs	18/16O	1s abs	δ18O	1s abs
	CMCA Session 3
-87.5	PL@01	0.00200601	0.026876	0.00183201	0.00198978	5.39151e-07	0.00201722	1.46744e-06	5.99378	1.46363
-86.5	PL@02	0.00200477	0.02569	0.00187758	0.00198873	5.15042e-07	0.00201615	1.45784e-06	5.46267	1.45406
-85.5	PL@03	0.00200582	0.025818	0.00187879	0.00198996	5.17879e-07	0.00201741	1.45966e-06	6.0868	1.45587
-84.5	PL@04	0.00200581	0.0282232	0.00189686	0.00199014	5.6612e-07	0.00201758	1.47806e-06	6.17552	1.47423
-83.5	PL@05	0.00200283	0.0260017	0.00191397	0.00198735	5.20787e-07	0.00201475	1.45905e-06	4.76267	1.45527
-82.5	tem@01	0.00201159	0.0258791	0.00199983	0.00199629	5.20598e-07	0.00202382	1.46469e-06	9.28483	1.46089
-81.5	tem@02	0.00201109	0.0260687	0.00209573	0.00199597	5.24279e-07	0.00202349	1.46583e-06	9.12228	1.46203
-80.5	915@01	0.00201511	0.0263629	0.00178336	0.00200018	5.31257e-07	0.00202776	1.4711e-06	11.252	1.46728
-79.5	915@02	0.00201083	0.0262491	0.0018885	0.00199608	5.2784e-07	0.0020236	1.46722e-06	9.17839	1.46341
-78.5	UAE436@01	0.00202992	0.0263368	0.00219755	0.00201536	5.34632e-07	0.00204315	1.48202e-06	18.9262	1.47817
-77.5	UAE436@02	0.00203016	0.0255841	0.00212741	0.00201578	5.19411e-07	0.00204358	1.47671e-06	19.1383	1.47288
-76.5	UAE436@03	0.00202967	0.0279311	0.00207554	0.00201548	5.66924e-07	0.00204327	1.49438e-06	18.9874	1.4905
-75.5	UAE436@04	0.00202921	0.0254279	0.00207528	0.00201521	5.16001e-07	0.002043	1.47512e-06	18.8496	1.47129
-74.5	UAE436@05	0.00202963	0.0256587	0.00215608	0.00201581	5.20791e-07	0.00204361	1.47723e-06	19.1547	1.4734
-73.5	PL@06	0.0020012	0.025902	0.00182214	0.00198757	5.18366e-07	0.00201497	1.4583e-06	4.87435	1.45452
-72.5	PL@07	0.00200037	0.0262092	0.00193626	0.00198692	5.24295e-07	0.00201432	1.46007e-06	4.54648	1.45628
-71.5	tem@03	0.00200679	0.0263197	0.00208296	0.00199353	5.28198e-07	0.00202102	1.46573e-06	7.89013	1.46192
-70.5	tem@04	0.00200782	0.0260153	0.00209712	0.00199474	5.22355e-07	0.00202225	1.46434e-06	8.50263	1.46055
-69.5	915@03	0.00201031	0.0260947	0.0017796	0.00199742	5.24601e-07	0.00202496	1.46688e-06	9.85632	1.46307
-68.5	915@04	0.00200978	0.0268557	0.00192568	0.00199707	5.39754e-07	0.00202461	1.47229e-06	9.67911	1.46848
-67.5	UAE436@06	0.00202732	0.0283513	0.00250758	0.0020148	5.74787e-07	0.00204259	1.49703e-06	18.6453	1.49315
-66.5	UAE436@07	0.00203095	0.0272787	0.00230525	0.00201862	5.54032e-07	0.00204645	1.49139e-06	20.5733	1.48752
-65.5	UAE436@08	0.0020465	0.0283484	0.00228874	0.00203435	5.80163e-07	0.0020624	1.51148e-06	28.5274	1.50756
-64.5	UAE436@09	0.00204777	0.0280084	0.00220789	0.00203581	5.73562e-07	0.00206388	1.50981e-06	29.2637	1.50589
-63.5	UAE436@10	0.00205009	0.0272551	0.0021462	0.00203831	5.5877e-07	0.00206642	1.50568e-06	30.53	1.50178
-62.5	PL@08	0.0020009	0.0281121	0.00197077	0.00198931	5.6251e-07	0.00201674	1.47612e-06	5.75527	1.47229
-61.5	PL@09	0.0019983	0.027839	0.00215624	0.00198689	5.5632e-07	0.00201429	1.47218e-06	4.53302	1.46836
-60.5	tem@05	0.00200654	0.026642	0.00201279	0.00199532	5.34598e-07	0.00202283	1.46925e-06	8.7943	1.46544
-59.5	tem@06	0.00200451	0.0264957	0.00210967	0.00199347	5.31124e-07	0.00202096	1.46677e-06	7.85923	1.46297
-58.5	915@05	0.00200694	0.0266463	0.0018756	0.00199609	5.34789e-07	0.00202361	1.4698e-06	9.18157	1.46599
-57.5	915@06	0.00200665	0.0293337	0.00190362	0.00199598	5.88638e-07	0.0020235	1.49074e-06	9.12873	1.48687
-56.5	UAE436@11	0.00204198	0.0260751	0.00196164	0.0020315	5.32465e-07	0.00205951	1.49151e-06	27.0867	1.48764
-55.5	UAE436@12	0.0020353	0.0309956	0.00254467	0.00202501	6.30866e-07	0.00205293	1.5264e-06	23.8027	1.52244
-54.5	UAE436@13	0.00204219	0.029921	0.00241189	0.00203208	6.11056e-07	0.0020601	1.52252e-06	27.3799	1.51857
-53.5	UAE436@14	0.00204042	0.0289967	0.0022923	0.0020305	5.9167e-07	0.0020585	1.51363e-06	26.5808	1.50971
-52.5	UAE436@15	0.00204361	0.0291326	0.00230583	0.00203387	5.95372e-07	0.00206192	1.51724e-06	28.2869	1.51331
-51.5	PL@10	0.00199799	0.0282247	0.00213602	0.00198844	5.63942e-07	0.00201586	1.47613e-06	5.31409	1.4723
-50.5	PL@11	0.00199674	0.0318841	0.00215546	0.00198737	6.36655e-07	0.00201478	1.50556e-06	4.7759	1.50166
-49.5	tem@07	0.00200287	0.0270705	0.00212878	0.00199369	5.42202e-07	0.00202118	1.47107e-06	7.96888	1.46726
-48.5	tem@08	0.00200082	0.0271889	0.00214925	0.00199183	5.44017e-07	0.00201929	1.47058e-06	7.02774	1.46676
-47.5	915@07	0.002006	0.0285651	0.00214956	0.00199719	5.7303e-07	0.00202473	1.48524e-06	9.7379	1.48138
-46.5	915@08	0.00200627	0.0287215	0.00216327	0.00199764	5.76244e-07	0.00202519	1.4868e-06	9.96818	1.48294
-45.5	UAE436@16	0.00204305	0.0364172	0.00221414	0.00203462	7.44035e-07	0.00206267	1.5837e-06	28.6612	1.57959
-44.5	UAE436@17	0.0020426	0.0266556	0.00208023	0.00203434	5.44481e-07	0.00206239	1.49777e-06	28.523	1.49388
-43.5	UAE436@18	0.00204133	0.0265814	0.0020265	0.00203326	5.42629e-07	0.0020613	1.49639e-06	27.9757	1.49251
-42.5	UAE436@19	0.00203933	0.033537	0.00275085	0.00203144	6.83942e-07	0.00205946	1.55366e-06	27.0583	1.54963
-41.5	UAE436@20	0.00203933	0.029712	0.00247679	0.00203163	6.05939e-07	0.00205965	1.52013e-06	27.1521	1.51619
-40.5	PL@12	0.00199454	0.0302801	0.00219525	0.00198702	6.03961e-07	0.00201442	1.49143e-06	4.5999	1.48757
-39.5	PL@13	0.00199423	0.0286832	0.00218749	0.0019869	5.72023e-07	0.0020143	1.47836e-06	4.53847	1.47453
-38.5	tem@09	0.00200098	0.0275808	0.00193707	0.00199384	5.51899e-07	0.00202133	1.47487e-06	8.0439	1.47104
-37.5	tem@10	0.00199904	0.0273882	0.00202199	0.00199208	5.47515e-07	0.00201955	1.47208e-06	7.15837	1.46826
-36.5	915@09	0.00200496	0.0294767	0.00223452	0.00199819	5.91008e-07	0.00202574	1.49309e-06	10.2432	1.48921
-35.5	915@10	0.0020047	0.0294458	0.0021816	0.00199812	5.90316e-07	0.00202567	1.49276e-06	10.21	1.48889
-34.5	UAE436@21	0.00204004	0.0302112	0.00246636	0.00203364	6.16334e-07	0.00206168	1.52568e-06	28.169	1.52172
-33.5	UAE436@22	0.00202791	0.0365939	0.00404206	0.0020217	7.42102e-07	0.00204957	1.57499e-06	22.1296	1.57091
-32.5	UAE436@23	0.00203637	0.0324764	0.0025404	0.00203034	6.61352e-07	0.00205834	1.54289e-06	26.4996	1.53889
-31.5	UAE436@24	0.0020392	0.0289335	0.0023189	0.00203336	5.90026e-07	0.0020614	1.51477e-06	28.0252	1.51084
-30.5	UAE436@25	0.00203834	0.0274675	0.00217007	0.00203268	5.59897e-07	0.00206071	1.50254e-06	27.6846	1.49865
-29.5	PL@14	0.00199404	0.0288741	0.00225599	0.00198857	5.75777e-07	0.00201599	1.48091e-06	5.38324	1.47707
-28.5	PL@15	0.00199252	0.0275533	0.0021473	0.00198723	5.49018e-07	0.00201463	1.46957e-06	4.70399	1.46576
-27.5	tem@11	0.00199832	0.0281642	0.00275958	0.00199322	5.62826e-07	0.00202071	1.47872e-06	7.73367	1.47488
-26.5	tem@12	0.00199739	0.0278721	0.00208554	0.00199247	5.56728e-07	0.00201995	1.47587e-06	7.35372	1.47204
-25.5	915@11	0.00200398	0.0292555	0.00216029	0.00199925	5.86288e-07	0.00202682	1.49184e-06	10.7808	1.48797
-24.5	915@12	0.00200274	0.0293044	0.0022136	0.0019982	5.86906e-07	0.00202575	1.49143e-06	10.2502	1.48756
-23.5	UAE436@26	0.00202601	0.0279162	0.00222213	0.00202166	5.656e-07	0.00204953	1.49776e-06	22.1093	1.49388
-22.5	UAE436@27	0.00203775	0.0319467	0.00290204	0.00203358	6.51008e-07	0.00206162	1.54037e-06	28.1381	1.53638
-21.5	UAE436@28	0.00203784	0.0327648	0.00271659	0.00203385	6.67705e-07	0.0020619	1.54786e-06	28.2744	1.54385
-20.5	UAE436@29	0.00203544	0.0298334	0.00256106	0.00203163	6.07254e-07	0.00205965	1.52067e-06	27.1542	1.51673
-19.5	UAE436@30	0.00203568	0.030561	0.00257613	0.00203206	6.22137e-07	0.00206008	1.52711e-06	27.3699	1.52315
-18.5	PL@16	0.00199424	0.0281053	0.00219072	0.00199081	5.60502e-07	0.00201826	1.47628e-06	6.5129	1.47245
-17.5	PL@17	0.00199213	0.0287056	0.0023861	0.00198888	5.71867e-07	0.00201631	1.47954e-06	5.53991	1.47571
-16.5	tem@13	0.00199989	0.0277883	0.00219425	0.00199683	5.55749e-07	0.00202436	1.47824e-06	9.55598	1.47441
-15.5	tem@14	0.00199805	0.0280552	0.0023587	0.00199517	5.6057e-07	0.00202269	1.47907e-06	8.71999	1.47523
-14.5	915@13	0.0020017	0.0304284	0.00250126	0.00199901	6.09099e-07	0.00202657	1.50105e-06	10.6591	1.49716
-13.5	915@14	0.00199896	0.0316626	0.00254539	0.00199645	6.32935e-07	0.00202398	1.50957e-06	9.36713	1.50566
-12.5	UAE436@31	0.00203426	0.0313137	0.00261922	0.00203194	6.37015e-07	0.00205996	1.53333e-06	27.3099	1.52935
-11.5	UAE436@32	0.00203664	0.0334102	0.00259912	0.00203451	6.80458e-07	0.00206256	1.55397e-06	28.608	1.54994
-10.5	UAE436@33	0.00203665	0.0292745	0.00246224	0.0020347	5.96232e-07	0.00206276	1.51811e-06	28.7053	1.51417
-9.5	UAE436@34	0.00201871	0.0282906	0.0026028	0.00201695	5.71119e-07	0.00204476	1.49694e-06	19.728	1.49306
-8.5	UAE436@35	0.00203556	0.0330076	0.00297195	0.00203398	6.71903e-07	0.00206203	1.54981e-06	28.3423	1.54579
-7.5	PL@18	0.0019908	0.0305585	0.00242338	0.00198941	6.08374e-07	0.00201685	1.49477e-06	5.80781	1.49089
-6.5	PL@19	0.00199043	0.0321799	0.00262549	0.00198923	6.40532e-07	0.00201666	1.5084e-06	5.71453	1.50448
-5.5	tem@15	0.00199594	0.0282694	0.00235354	0.00199492	5.64254e-07	0.00202242	1.48034e-06	8.59001	1.47651
-4.5	tem@16	0.00199704	0.0283314	0.00239321	0.0019962	5.65802e-07	0.00202373	1.48176e-06	9.23993	1.47792
-3.5	915@15	0.00199977	0.034683	0.00248776	0.00199912	6.93592e-07	0.00202669	1.53834e-06	10.7165	1.53435
-2.5	915@16	0.00199721	0.0324226	0.00249575	0.00199674	6.4756e-07	0.00202428	1.51611e-06	9.51394	1.51218
-1.5	UAE436@36	0.00203309	0.0318159	0.00275604	0.00203282	6.46861e-07	0.00206085	1.5381e-06	27.752	1.53411
-0.5	UAE436@37	0.00203309	0.0316447	0.00292315	0.002033	6.43378e-07	0.00206103	1.53671e-06	27.8437	1.53273
0.5	UAE436@38	0.00203322	0.0300382	0.00259694	0.00203332	6.10758e-07	0.00206136	1.52317e-06	28.0048	1.51922
1.5	UAE436@39	0.0020346	0.0303292	0.00257815	0.00203487	6.17089e-07	0.00206293	1.52676e-06	28.7917	1.5228
2.5	UAE436@40	0.00201578	0.0284119	0.00260961	0.00201624	5.72734e-07	0.00204404	1.49713e-06	19.372	1.49325
3.5	PL@20	0.00198672	0.0325777	0.00261236	0.00198737	6.47239e-07	0.00201477	1.51019e-06	4.77308	1.50627
4.5	PL@21	0.00198794	0.0349981	0.00265168	0.00198878	6.95753e-07	0.0020162	1.53305e-06	5.4867	1.52908
5.5	tem@17	0.00199268	0.0287906	0.0021711	0.0019937	5.7372e-07	0.00202119	1.48331e-06	7.97592	1.47947
6.5	tem@18	0.00199364	0.0296827	0.00232999	0.00199484	5.91778e-07	0.00202235	1.4913e-06	8.55253	1.48744
7.5	915@17	0.00199579	0.0336039	0.00251379	0.00199718	6.70676e-07	0.00202472	1.52667e-06	9.73634	1.52272
8.5	915@18	0.00199463	0.034337	0.0024876	0.00199621	6.84909e-07	0.00202373	1.53256e-06	9.24314	1.52859
9.5	UAE436@41	0.00203018	0.0344473	0.00299859	0.00203195	6.99354e-07	0.00205996	1.561e-06	27.3113	1.55695
10.5	UAE436@42	0.00202967	0.029352	0.00259052	0.00203162	5.95764e-07	0.00205964	1.51599e-06	27.1483	1.51206
11.5	UAE436@43	0.00203089	0.0322448	0.00292118	0.00203302	6.54869e-07	0.00206106	1.54171e-06	27.8563	1.53771
12.5	UAE436@44	0.00203081	0.0322945	0.00282503	0.00203313	6.55852e-07	0.00206116	1.5422e-06	27.9086	1.5382
13.5	UAE436@45	0.00203283	0.0325296	0.00277825	0.00203533	6.61284e-07	0.0020634	1.54594e-06	29.0247	1.54193
14.5	PL@22	0.0019862	0.0364016	0.00251675	0.00198889	7.23021e-07	0.00201632	1.54604e-06	5.54327	1.54203
16.5	tem@19	0.0019937	0.0291116	0.00241041	0.00199676	5.80413e-07	0.0020243	1.48791e-06	9.5242	1.48405
17.5	tem@20	0.0019944	0.0290671	0.00244113	0.00199765	5.79728e-07	0.00202519	1.48819e-06	9.97138	1.48434
18.5	915@19	0.0019937	0.0316671	0.00269952	0.00199713	6.3136e-07	0.00202467	1.50931e-06	9.71126	1.5054
19.5	915@20	0.00199347	0.0328731	0.00275115	0.00199709	6.55326e-07	0.00202462	1.51975e-06	9.68673	1.51581
20.5	UAE436@46	0.00201323	0.0307585	0.00280117	0.00201704	6.19255e-07	0.00204485	1.51654e-06	19.7743	1.51261
21.5	UAE436@47	0.00201693	0.0290044	0.00249745	0.00202092	5.85013e-07	0.00204879	1.50495e-06	21.7382	1.50104
22.5	UAE436@48	0.00202618	0.0334798	0.00308636	0.00203035	6.78372e-07	0.00205835	1.55048e-06	26.5066	1.54646
23.5	UAE436@49	0.00202534	0.0319377	0.00281397	0.0020297	6.4686e-07	0.00205769	1.53617e-06	26.1752	1.53219
24.5	UAE436@50	0.00203053	0.0324175	0.00285122	0.00203508	6.58261e-07	0.00206314	1.54446e-06	28.896	1.54045
25.5	PL@24	0.00198575	0.0343581	0.00279226	0.00199048	6.82279e-07	0.00201793	1.52786e-06	6.34835	1.5239
26.5	PL@25	0.00198209	0.0323002	0.00275975	0.00198701	6.40233e-07	0.00201441	1.50689e-06	4.59272	1.50299
27.5	tem@21	0.00198949	0.0306931	0.0026745	0.00199459	6.1065e-07	0.0020221	1.49895e-06	8.42577	1.49506
28.5	tem@22	0.00199211	0.0295612	0.00248215	0.0019974	5.88904e-07	0.00202494	1.49173e-06	9.84367	1.48787
29.5	915@21	0.00199485	0.0339304	0.0027469	0.00200032	6.76872e-07	0.00202791	1.5314e-06	11.3237	1.52743
30.5	915@22	0.00199556	0.0338837	0.00280089	0.00200122	6.76181e-07	0.00202881	1.53164e-06	11.776	1.52766
31.5	UAE436@51	0.00202588	0.0305997	0.0026472	0.00203172	6.19926e-07	0.00205974	1.52597e-06	27.1974	1.52202
32.5	UAE436@52	0.00201325	0.0295556	0.00271971	0.00201928	5.95042e-07	0.00204712	1.50795e-06	20.9078	1.50404
33.5	UAE436@53	0.00200639	0.0342496	0.00313428	0.0020126	6.87192e-07	0.00204035	1.54361e-06	17.5312	1.53961
34.5	UAE436@54	0.00201329	0.0323608	0.00296192	0.00201968	6.51527e-07	0.00204753	1.53201e-06	21.1125	1.52804
35.5	UAE436@55	0.00201766	0.0313705	0.00281364	0.00202425	6.32963e-07	0.00205216	1.52682e-06	23.4192	1.52286
36.5	PL@26	0.00198145	0.0326037	0.00262037	0.00198822	6.46039e-07	0.00201564	1.51019e-06	5.20594	1.50627
37.5	PL@27	0.00197994	0.0318135	0.00262072	0.00198689	6.29901e-07	0.00201429	1.50234e-06	4.53427	1.49844
38.5	tem@23	0.00198862	0.0298115	0.00243506	0.00199576	5.92853e-07	0.00202328	1.49232e-06	9.01901	1.48845
39.5	tem@24	0.00198817	0.0297639	0.00242388	0.0019955	5.9177e-07	0.00202301	1.49171e-06	8.88376	1.48784
40.5	915@23	0.00199186	0.0329668	0.00257566	0.00199937	6.56665e-07	0.00202694	1.52175e-06	10.8426	1.5178
41.5	915@24	0.00199208	0.0325084	0.00263474	0.00199978	6.47607e-07	0.00202736	1.51801e-06	11.0492	1.51407
42.5	UAE436@56	0.00201009	0.0320816	0.00285963	0.00201797	6.4488e-07	0.0020458	1.52806e-06	20.2464	1.52409
43.5	UAE436@57	0.00201145	0.0293429	0.00231658	0.00201951	5.90229e-07	0.00204736	1.50615e-06	21.0263	1.50225
47.5	PL@28	0.00198101	0.0322705	0.00261899	0.00198982	6.39297e-07	0.00201726	1.50823e-06	6.01607	1.50431
48.5	PL@29	0.00197942	0.0321373	0.00257689	0.00198841	6.36143e-07	0.00201583	1.50598e-06	5.30193	1.50208
49.5	tem@25	0.00198562	0.0305302	0.00236132	0.0019948	6.06227e-07	0.00202231	1.49723e-06	8.53183	1.49335
50.5	tem@26	0.00198733	0.0298487	0.0024994	0.00199669	5.93205e-07	0.00202423	1.49305e-06	9.48863	1.48917
51.5	915@25	0.00198892	0.0313675	0.00265602	0.00199848	6.23889e-07	0.00202604	1.50695e-06	10.3908	1.50304
52.5	915@26	0.00198577	0.0326205	0.00272549	0.00199551	6.4778e-07	0.00202303	1.51545e-06	8.89001	1.51152
59.5	PL@31	0.00197852	0.0323356	0.00263489	0.00198955	6.39777e-07	0.00201699	1.50827e-06	5.87899	1.50436
60.5	tem@27	0.00198328	0.0298368	0.0022759	0.0019945	5.91762e-07	0.00202201	1.49108e-06	8.38186	1.48722
61.5	tem@28	0.00198253	0.0300204	0.00238624	0.00199393	5.95175e-07	0.00202143	1.49212e-06	8.09292	1.48825
62.5	915@27	0.00198502	0.0363038	0.00271938	0.00199661	7.20648e-07	0.00202414	1.54955e-06	9.4461	1.54554
63.5	915@28	0.00198127	0.0327632	0.00271562	0.00199305	6.4914e-07	0.00202053	1.51453e-06	7.64648	1.5106
69.5	PL@32	0.00197407	0.0329992	0.00264995	0.00198696	6.5144e-07	0.00201436	1.51179e-06	4.56848	1.50787
70.5	PL@33	0.00197592	0.0342729	0.00289309	0.00198899	6.77216e-07	0.00201642	1.52463e-06	5.59606	1.52068
71.5	tem@29	0.00198474	0.0300055	0.00242678	0.00199801	5.95546e-07	0.00202556	1.49482e-06	10.1526	1.49095
72.5	tem@30	0.00198435	0.0316946	0.00239324	0.0019978	6.28946e-07	0.00202535	1.50869e-06	10.0487	1.50478
73.5	915@29	0.00198138	0.037638	0.00261755	0.00199502	7.45765e-07	0.00202253	1.56077e-06	8.64141	1.55672
74.5	915@30	0.00198043	0.033	0.00260908	0.00199425	6.53554e-07	0.00202175	1.51722e-06	8.25337	1.51328
80.5	PL@34	0.00197109	0.0359381	0.00277253	0.00198603	7.08386e-07	0.00201341	1.53732e-06	4.09545	1.53334
81.5	PL@35	0.00197433	0.0348888	0.00284793	0.00198944	6.88831e-07	0.00201688	1.53025e-06	5.82377	1.52628
82.5	tem@31	0.00198157	0.0323536	0.00227464	0.00199687	6.41121e-07	0.00202441	1.51338e-06	9.57896	1.50945
83.5	tem@32	0.0019826	0.0334111	0.00236791	0.00199809	6.62421e-07	0.00202565	1.52352e-06	10.196	1.51957
84.5	915@31	0.00198302	0.0330843	0.00282297	0.0019987	6.56081e-07	0.00202626	1.52107e-06	10.5021	1.51713
85.5	915@32	0.00198349	0.0345006	0.00300571	0.00199935	6.84329e-07	0.00202692	1.53421e-06	10.8335	1.53023
86.5	PL@36	0.00197058	0.0348622	0.00284432	0.00198663	6.87e-07	0.00201402	1.52768e-06	4.39977	1.52372
87.5	PL@37	0.00197476	0.0347667	0.00282579	0.00199099	6.86569e-07	0.00201844	1.53014e-06	6.60385	1.52617

## Sheet: DR6
Comments					Final207_235	Final207_235_Int2SE	Final206_238	Final206_238_Int2SE	ErrorCorrelation_6_38vs7_35	Final238_206	Final238_206_Int2SE	Final207_206	Final207_206_Int2SE	ErrorCorrelation_38_6vs7_6	Final208_232	Final208_232_Int2SE	Final206_208	Final206_208_Int2SE	FinalAge207_235	FinalAge207_235_Int2SE	FinalAge206_238	FinalAge206_238_Int2SE	FinalAge208_232	FinalAge208_232_Int2SE	FinalAge207_206	FinalAge207_206_Int2SE	Final206_204	Final206_204_Int2SE	Final207_204	Final207_204_Int2SE	Final208_204	Final208_204_Int2SE	Approx_U_PPM	Approx_U_PPM_Int2SE	Approx_Th_PPM	Approx_Th_PPM_Int2SE	Approx_Pb_PPM	Approx_Pb_PPM_Int2SE	Final_U_Th_Ratio	Final_U_Th_Ratio_Int2SE
13-24_Hf - 6.d	0.0485	0.0022	0.01649	0.00051	0.1065	0.0052	0.01649	0.00051	0.633426	60.6428	1.87555	0.0485	0.0022	0.18046	0.00696	0.00041	18.63	0.78	102.7	4.8	105.4	3.2	140.1	8.3	140	110	57000	86000	no value	NAN	no value	NAN	2800	180	448	31	29.9	2.8	6.33	0.13
14-09_Hf - 10.d	0.0517	0.0052	0.01574	0.00048	0.0935	0.0082	0.01574	0.00048	0.347724	63.5324	1.93746	0.0517	0.0052	0.12027	0.00539	0.00027	7.23	0.38	92.8	8.6	100.7	3.1	108.7	5.4	210	200	10000	36000	no value	NAN	no value	NAN	1460	110	628	67	31	3	2.386	0.083
14-09_Hf - 12.d	0.0514	0.0035	0.01559	0.0002	0.0966	0.0072	0.01559	0.0002	0.172119	64.1437	0.822882	0.0514	0.0035	-0.12431	0.00473	0.00018	7.51	0.28	93.4	6.7	99.7	1.3	95.3	3.6	220	150	-39000	35000	no value	NAN	no value	NAN	2120	210	969	98	41.9	3.9	2.205	0.029
14-09_Hf - 13.d	0.0539	0.0045	0.01542	0.00043	0.1008	0.0084	0.01542	0.00043	0.33463	64.8508	1.80842	0.0539	0.0045	-0.097238	0.0048	0.00034	11.67	0.84	97.3	7.8	98.6	2.7	96.9	6.9	310	180	-11000	26000	no value	NAN	no value	NAN	1800	170	526	64	23.7	3.5	3.52	0.1
14-09_Hf - 14.d	0.0563	0.0046	0.01596	0.00037	0.1103	0.0095	0.01596	0.00037	0.269166	62.6566	1.45257	0.0563	0.0046	-0.060303	0.00489	0.00035	9.1	1.4	105.9	8.7	102	2.3	98.6	7.1	400	180	-11000	39000	no value	NAN	no value	NAN	2030	350	940	230	45	12	2.52	0.22
14-09_Hf - 7.d	0.0551	0.0071	0.01484	0.00054	0.096	0.012	0.01484	0.00054	0.291105	67.3854	2.45203	0.0551	0.0071	0.24305	0.00501	0.0003	6.92	0.45	92	11	95	3.4	100.9	6.1	310	270	23000	28000	no value	NAN	no value	NAN	830	120	390	65	18	3.4	2.213	0.066
14-25_Hf - 11.d	0.048	0.021	0.01532	0.00093	0.119	0.05	0.01532	0.00093	0.144478	65.2742	3.96246	0.048	0.021	-0.038485	0.0054	0.0013	6.6	2.4	106	46	98	5.9	109	25	-370	730	2100	2300	no value	NAN	no value	NAN	112.2	4.5	61.9	2.8	3.11	0.68	1.839	0.057
14-25_Hf - 12.d	0.046	0.011	0.01523	0.00049	0.112	0.026	0.01523	0.00049	0.138593	65.6599	2.1125	0.046	0.011	0.11377	0.0055	0.00066	6.95	0.98	105	24	97.4	3.1	111	13	-140	390	3100	5900	no value	NAN	no value	NAN	300	18	129.2	6.6	6.72	0.81	2.338	0.047
14-25_Hf - 15.d	0.0432	0.0098	0.01457	0.00055	0.101	0.022	0.01457	0.00055	0.173301	68.6342	2.59086	0.0432	0.0098	0.20304	0.00473	0.0008	10.8	1.6	96	20	93.2	3.5	95	16	-150	400	2100	5300	no value	NAN	no value	NAN	340	18	99.7	2.8	4.56	0.74	3.39	0.15
14-25_Hf - 3.d	0.058	0.013	0.01511	0.00058	0.124	0.028	0.01511	0.00058	0.169991	66.1813	2.54038	0.058	0.013	0.18986	0.0052	0.00062	4.97	0.6	116	25	96.7	3.7	105	12	240	470	-17000	16000	no value	NAN	no value	NAN	243	21	140	13	6.79	0.94	1.726	0.025
14-25_Hf - 7.d	0.041	0.017	0.01473	0.00071	0.086	0.034	0.01473	0.00071	0.12192	67.8887	3.2723	0.041	0.017	0.0086017	0.0041	0.00043	4.36	0.56	79	32	94.2	4.5	82.7	8.6	-460	620	-50000	12000	no value	NAN	no value	NAN	221.4	4	179.8	3.3	7.05	0.76	1.23	0.029
14-25_Hf - 9.d	0.045	0.013	0.01565	0.00057	0.1	0.03	0.01565	0.00057	0.121406	63.8978	2.32727	0.045	0.013	-0.024382	0.00479	0.00059	5.86	0.8	94	28	100.1	3.6	96	12	-230	510	-6800	7400	no value	NAN	no value	NAN	164.7	6.7	97.3	2.1	4.4	0.53	1.685	0.058
14-29_Hf - 2.d	0.044	0.018	0.01391	0.00091	0.094	0.038	0.01391	0.00091	0.16183	71.8907	4.70313	0.044	0.018	0.48694	0.00393	0.00043	2.93	0.31	86	36	89	5.8	79.2	8.6	-380	690	1000	2600	no value	NAN	no value	NAN	143	11	171	14	6.11	0.61	0.852	0.012
UAE413_Hf - 1.d	0.0465	0.0037	0.01582	0.00044	0.1015	0.0077	0.01582	0.00044	0.366625	63.2111	1.75808	0.0465	0.0037	0.21486	0.00528	0.00041	14	1.8	98	7.1	101.2	2.8	106.3	8.3	60	180	-81000	67000	no value	NAN	no value	NAN	1061	35	247	26	12.3	1.7	4.55	0.4
UAE413_Hf - 2.d	0.0523	0.0088	0.01702	0.00047	0.124	0.022	0.01702	0.00047	0.155646	58.7544	1.62248	0.0523	0.0088	-0.054428	0.00549	0.00062	8.5	1.5	117	20	108.8	3	111	12	150	330	-27000	33000	no value	NAN	no value	NAN	402	24	176	32	8.3	1.5	3.06	0.62
UAE413_Hf - 4.d	0.056	0.012	0.01573	0.00067	0.124	0.025	0.01573	0.00067	0.211265	63.5728	2.70781	0.056	0.012	0.60316	0.00566	0.00055	4.6	0.56	116	22	100.6	4.3	114	11	280	420	4700	9900	no value	NAN	no value	NAN	249	36	155	32	7.9	1.8	1.724	0.091
																				wtd avg	99.799
																				±2s wtd	1.43495
																				MSWD	1.70107

## Sheet: DR7
Comments	Hf178Hf177c	Hf178Hf177c_Int2SE	Hf180Hf177c	Hf180Hf177c_Int2SE	Yb176Hf177	Yb176Hf177_Int2SE	Lu176Hf177	Lu176Hf177_Int2SE	TotalHf	TotalHf_Int2SE	StdCorr_176Hf_177Hf	StdCorr_176Hf_177Hf_Int2SE	εHf	2s
13-24_Hf - 6	1.46686	0.0002	1.88697	0.0002	0.4075	0.0032	0.010455	6.5e-05	5.89	0.59	0.282744	5.2e-05	0.451311	0.52
14-09_Hf - 10	1.4671	0.0002	1.88696	0.00017	0.1802	0.0017	0.005175	3e-05	5.87	0.5	0.282685	4.1e-05	-1.30094	0.41
14-09_Hf - 12	1.46705	0.0002	1.88678	0.00017	0.1724	0.0079	0.00478	0.00019	7.96	0.49	0.282731	4.7e-05	0.351196	0.47
14-09_Hf - 13	1.4669	0.00018	1.88704	0.00023	0.2244	0.0015	0.00655	1.8e-05	5.88	0.54	0.282672	3.8e-05	-1.84792	0.38
14-09_Hf - 14	1.46701	0.00019	1.88704	0.00015	0.205	0.01	0.00571	0.00023	6.96	0.62	0.282674	4.7e-05	-1.72394	0.47
14-09_Hf - 7	1.46657	0.00039	1.88689	0.00029	0.2123	0.0063	0.00633	0.00023	4.17	0.75	0.282696	8e-05	-0.985059	0.8
14-25_Hf - 11	1.46703	0.00018	1.88691	0.0002	0.06476	0.00074	0.00189	1.5e-05	5.82	0.33	0.282606	3.4e-05	-3.88707	0.34
14-25_Hf - 12	1.46706	0.00018	1.88685	0.00014	0.0659	0.0029	0.001803	7.6e-05	5.93	0.3	0.282621	3.5e-05	-3.35098	0.35
14-25_Hf - 15	1.46694	0.00022	1.88709	0.00022	0.1326	0.0036	0.003335	6.5e-05	5.73	0.44	0.282734	5.5e-05	0.548904	0.55
14-25_Hf - 3	1.46709	0.00018	1.88683	0.00017	0.061	0.0026	0.001656	5.8e-05	5.64	0.32	0.282794	5e-05	2.77763	0.5
14-25_Hf - 7	1.46697	0.00023	1.8869	0.00018	0.0886	0.0021	0.002491	8.3e-05	5.52	0.46	0.28273	3.6e-05	0.460915	0.36
14-25_Hf - 9	1.46712	0.00015	1.88686	0.00012	0.09	0.0015	0.00258	5.1e-05	6.38	0.4	0.282593	4.7e-05	-4.39064	0.47
14-29_Hf - 2	1.46708	0.00024	1.88714	0.00015	0.2232	0.0097	0.00621	0.00024	6.22	0.45	0.282717	5.7e-05	-0.234649	0.57
UAE413_Hf - 1	1.46711	0.00013	1.88701	0.00021	0.0544	0.0019	0.001437	4.8e-05	5.54	0.3	0.282718	4.9e-05	0.103264	0.49
UAE413_Hf - 2	1.46662	0.00065	1.88671	0.00019	0.0783	0.0025	0.002169	8.1e-05	5.68	0.53	0.282783	7.2e-05	2.35602	0.72
UAE413_Hf - 4	1.46702	0.0002	1.88674	0.0002	0.0566	0.0046	0.00149	0.0001	5.26	0.41	0.282729	5.2e-05	0.488993	0.52

## Sheet: DR8
Comments	Si29_CPS	Si29_CPS_Int2SE	P_ppm_m31	P_ppm_m31_Int2SE	Ca_ppm_m44	Ca_ppm_m44_Int2SE	Ti_ppm_m49	Ti_ppm_m49_Int2SE	Y_ppm_m89	Y_ppm_m89_Int2SE	Zr_ppm_m90	Zr_ppm_m90_Int2SE	Nb_ppm_m93	Nb_ppm_m93_Int2SE	La_ppm_m139	La_ppm_m139_Int2SE	Ce_ppm_m140	Ce_ppm_m140_Int2SE	Pr_ppm_m141	Pr_ppm_m141_Int2SE	Nd_ppm_m146	Nd_ppm_m146_Int2SE	Sm_ppm_m147	Sm_ppm_m147_Int2SE	Eu_ppm_m151	Eu_ppm_m151_Int2SE	Gd_ppm_m157	Gd_ppm_m157_Int2SE	Tb_ppm_m159	Tb_ppm_m159_Int2SE	Dy_ppm_m163	Dy_ppm_m163_Int2SE	Ho_ppm_m165	Ho_ppm_m165_Int2SE	Er_ppm_m166	Er_ppm_m166_Int2SE	Tm_ppm_m169	Tm_ppm_m169_Int2SE	Yb_ppm_m172	Yb_ppm_m172_Int2SE	Lu_ppm_m175	Lu_ppm_m175_Int2SE	Hf_ppm_m178	Hf_ppm_m178_Int2SE	Pb_ppm_m204	Pb_ppm_m204_Int2SE	Pb_ppm_m206	Pb_ppm_m206_Int2SE	Pb_ppm_m207
nist 612 - 1.d	296000	19000	68	54	100800	1500	69	16	44.9	1.3	46.8	2.5	46.4	1.6	42.66	0.55	46.1	1.1	44.11	0.71	42.8	1.8	45.4	2.1	41.1	1.2	42.8	1.8	42.89	0.88	43.2	1.5	45.8	1	45.2	1.2	45.08	0.91	47.1	2.8	44	1.1	40.8	1.6	45.9	5	46.8	1.3	45.74
nist 612 - 2.d	296000	18000	49	50	101500	1400	43	12	45.3	1.6	43.8	2.4	48.9	1.5	42.44	0.77	46.06	0.8	44.48	0.69	41.9	2.3	46.1	2.2	41.9	1	44.3	1.6	42.8	0.85	43	1.5	45.01	0.9	45.6	1.4	45.55	0.94	45.2	2.3	43.5	1.2	43.3	1.8	45.7	5.8	43.8	1.6	46
nist 612 - 3.d	285000	19000	63	75	101500	1700	46	13	46.7	1.8	45	2	48.1	1.8	42.91	0.88	45.8	1.2	44.18	0.8	43.4	2	44.6	2.1	42.5	1	44.1	2.3	42.9	1	42.5	1.6	44.8	0.98	45.1	1.2	45.19	0.91	48.7	2.1	44.4	1.1	41.7	1.8	46.4	5.4	46.7	1.5	47.4
nist 612 - 4.d	281000	20000	85	86	101900	1400	53	14	45.2	1.4	45.4	2.4	48	2	42.81	0.71	46.8	1.1	45.14	0.85	43.1	1.5	44.4	2.3	41.5	1.3	45.1	2.5	43.13	0.8	41.7	1.7	45.34	0.85	45.2	1.4	45.5	1	45.2	2.3	44.3	1.2	41.9	1.6	46	5.7	46	1.3	46
nist 612 - 5.d	281000	19000	20	180	100800	1300	56	10	44.7	1.8	45.9	2.5	46.7	1.8	42.47	0.77	45.8	1	43.81	0.78	42.4	1.7	46.3	2.2	41.3	1.2	42.8	1.8	42.69	0.9	44.1	1.7	45.5	0.9	45.4	1.7	45.11	0.9	47	2.6	43.6	1.2	41	1.9	45.7	5.5	46	1.2	45.4
nist 610 - 1.d	314000	17000	237	61	97400	1700	662	45	550	8.6	532.1	9.7	597.9	9.1	529.6	6.2	556.8	7.9	536.7	6.7	528.1	8.1	559.3	8.4	537.4	6.4	513.8	7.9	509.8	7.7	524.5	7.5	539.8	8.2	541.2	9.8	538.6	8.1	551.4	9	529	10	504	10	486	19	517.7	9.4	526
nist 610 - 2.d	311000	21000	256	76	101400	1800	628	41	563.1	8.5	546.6	8.5	605.1	8.8	539.5	5.8	564.5	6.5	547.7	6.3	543.8	8.8	562	11	546.8	5.2	527.2	8.6	519.3	7.1	542.1	8.2	549.2	6.3	549.3	9	547.1	8	553.4	8.6	542.1	7.4	510.7	9.5	522	16	523	7.5	528.9
nist 610 - 3.d	301000	19000	279	96	100700	1500	614	45	568.3	9.7	561	9.5	603.8	9	545.1	6.9	567.2	8.3	552.8	7.8	545.3	9.2	565	10	550.2	6.9	534	10	526.4	7.4	547.8	8.2	554.9	8.4	561.3	8.3	553	7	573	11	541.1	7.7	516	11	537	16	532	7.2	531.3
nist 610 - 4.d	299000	20000	410	96	100300	1300	577	41	561.1	9.9	554	11	587	11	534.4	7.4	563.5	9	538.9	9	542	12	550.7	9.7	539.4	9	524	11	517.8	8.7	540	10	547	10	546	10	545.2	9.2	561	12	531.9	9.6	497	9.8	528	24	529.1	9.6	520.1
nist 610 - 5.d	302000	19000	570	150	99100	1200	556	33	553.3	8.2	548	11	575	8	529.2	6.3	553	8.6	529.7	6.2	539	11	537.3	9	528.2	6.8	520.8	8.7	507.2	6.8	538.7	8.9	536.7	6.3	536.4	8.7	535.8	7.2	565	12	523.1	8.1	487.1	8.8	530	16	517.3	8.6	507.5
PLES - 1.d	193800	9200	570	110	190	360	218	39	1276	30	1138000	18000	12	0.9	0.088	0.04	5.4	0.4	0.36	0.061	4.32	0.72	8.6	1.3	2.16	0.34	31.5	2.2	11.91	0.48	137.9	4.5	39.1	1.2	141.1	3.7	24.42	0.71	167.6	5.7	24.18	0.97	28330	480			361.8	4.6	21.22
PLES - 2.d	192900	7800	660	130	130	300	209	29	1401	44	1121000	28000	12.03	0.88	0.064	0.031	5.78	0.43	0.335	0.063	5.28	0.79	9.2	1	2.32	0.32	37.9	2.5	13.41	0.67	148.7	5.7	41.4	1.6	153.8	5.6	26.7	1.1	175.8	6.6	26.5	1.4	27730	740	1.1	3.3	392.9	6.1	22.2
PLES - 3.d	197300	6300	500	150			140	32	627	25	1164000	31000	10.39	0.73	0.034	0.03	3.82	0.3	0.17	0.052	1.94	0.51	4.03	0.56	1.14	0.19	15.1	1.5	5.68	0.36	66.1	3.3	18.08	0.91	69.1	3.6	11.89	0.55	80.7	4.7	11.89	0.96	28110	860			281.2	7.8	16.4
PLES - 4.d	196800	8000	510	120			138	24	671	21	1160000	24000	11	0.85	0.005	0.021	4.02	0.26	0.184	0.047	2.22	0.48	3.98	0.59	1.07	0.2	15.4	1.4	6.18	0.37	68.5	3.2	19.4	0.78	73.8	2.8	12.53	0.65	88.3	4.1	13.05	0.82	27810	570	0.6	2.5	290.4	5.4	16.8
PLES - 5.d	192100	8100	1020	210	160	380	162	27	762	19	1175000	24000	11.89	0.94	0.01	0.023	4.48	0.4	0.172	0.049	2.81	0.72	4.93	0.73	1.09	0.21	17.7	1.4	6.64	0.39	82.6	3.3	22.64	0.95	84	2.8	14.11	0.55	106.1	5.6	14.58	0.75	27510	550	0.1	3.3	322.5	6.5	18.6
PLES - 6.d	188300	8300	830	150			163	20	677	24	1187000	28000	10.7	1.1	0.004	0.025	4.27	0.36	0.182	0.04	1.94	0.53	4.51	0.84	0.75	0.19	17	1.4	6.2	0.4	73.4	3.1	20.38	0.82	75.8	3.1	13.07	0.67	91.3	5	13.17	0.86	28160	710			294.8	6.4	17.54
PLES - 7.d	188100	7800	1240	210			159	26	947	28	1190000	25000	13.78	0.9	0.046	0.035	5.37	0.37	0.245	0.065	3.38	0.79	5.64	0.85	1.35	0.25	22.7	1.8	8.55	0.56	98.2	4.1	28.3	1.1	106.3	4.2	18.52	0.86	126.4	6	17.8	1	26830	640			437.2	7.3	24.1
PLES - 8.d	187400	7200	930	180			196	31	889	15	1194000	23000	12.13	0.92	0.017	0.023	4.94	0.4	0.176	0.042	3.36	0.68	5.49	0.95	1.21	0.24	19.8	1.6	8.1	0.42	94.5	3.1	27.19	0.7	99.5	3.2	17.65	0.6	121.6	5.4	16.54	0.84	27050	540	3.8	3.6	402	7	23.7
PLES - 9.d	186700	8800	1970	350			281	31	1598	31	1206000	24000	12.37	0.91	0.047	0.031	5.88	0.39	0.449	0.078	6.45	0.8	10.3	1.3	2.73	0.34	40.1	2.4	15.05	0.64	175.9	4.7	48.2	1.4	178.5	4.5	30.7	1	216.4	7.7	30	1.1	27110	590			418.6	6.9	23.6
PLES - 10.d	186100	8600	1460	300	210	390	140	25	961	14	1211000	23000	13	1.1	0.015	0.029	5.63	0.33	0.227	0.062	3.1	0.69	5.68	0.82	1.28	0.23	23.1	2.1	8.25	0.43	100.7	2.6	28.8	0.86	108.7	3.4	18.97	0.8	141	5.9	18.01	0.93	26490	530			441	10	26
91500 - 1.d	187800	8300	40	100			10	10	334.4	7.7	1169000	20000	2.7	0.47	0.01	0.023	6.43	0.4	0.012	0.022	0.52	0.34	0.93	0.42	0.5	0.13	5.78	0.71	1.74	0.19	27.5	1.7	10.87	0.63	60.9	2.5	15.59	0.71	156.1	5.5	33.5	1.2	13770	260			137.8	3.5	12.1
91500 - 2.d	189000	8400	140	100	410	310	14	10	326.5	8.1	1160000	18000	2.73	0.45			6.24	0.33	0.026	0.025	0.11	0.17	0.68	0.26	0.49	0.12	4.56	0.65	1.84	0.25	26.8	1.5	11.54	0.58	59.4	1.9	15.18	0.74	151.3	5.3	32.2	1.3	13980	250	2	4.2	135.3	2.4	11.24
91500 - 3.d	189300	8500					13	11	327.1	6.9	1178000	20000	2.45	0.44			6.15	0.35	0.023	0.022	0.42	0.22	0.91	0.34	0.66	0.18	4.26	0.66	1.83	0.17	26	1.6	10.37	0.5	60.9	2.3	15.2	0.64	158.6	5.3	32.6	1.2	14760	270	0.2	3.3	134.3	3.7	11.17
91500 - 4.d	196700	7300	110	130			12.2	8.9	313.5	7.2	1177000	21000	2.49	0.31	0.002	0.021	5.94	0.43	0.021	0.021	0.43	0.22	0.51	0.29	0.39	0.13	4.71	0.7	1.74	0.16	25.1	1.4	10.04	0.33	58	2.5	14.8	0.68	146.6	6.5	30.1	1.4	14730	290			130	2.5	11.19
91500 - 5.d	184500	7100	60	130			20	13	304.8	9.5	1208000	26000	2.3	0.4	0.012	0.03	6.11	0.4	0.006	0.019	0.52	0.33	0.76	0.29	0.47	0.14	4.91	0.92	1.71	0.17	23.6	1.6	9.6	0.5	55.6	2.6	13.68	0.62	143.1	5.7	31.2	1.2	14980	360	0.9	3.6	126.3	3	10.11
91500 - 6.d	185800	6500	130	140			14	11	302.7	6.9	1209000	21000	2.02	0.37	0.013	0.023	5.84	0.36	0.042	0.024	0.48	0.27	0.97	0.48	0.54	0.17	4.99	0.89	1.61	0.19	23.5	1.6	10	0.55	56.8	1.6	13.61	0.61	149.1	5	29.6	1.1	14840	300			128	2.1	10.65
91500 - 7.d	184100	7600	100	160	80	370	19.3	9	311.4	7.4	1217000	20000	2.34	0.48	0.004	0.02	6.2	0.4	0.046	0.029	0.57	0.24	0.68	0.31	0.48	0.14	4.47	0.83	1.7	0.14	24.2	1.5	9.9	0.49	58.8	2.6	14.73	0.65	154	7	30.4	1	14490	240	1.4	4.3	128.6	2.7	9.68
91500 - 8.d	183500	7100			230	330	13	10	330	10	1218000	27000	2.63	0.37	0	0.023	6.16	0.53	0.007	0.018	0.66	0.27	0.6	0.3	0.61	0.19	4.82	0.74	1.87	0.15	27.5	1.6	10.67	0.56	59.3	2.3	14.66	0.76	157.5	7.4	31	1.4	14780	370			130.3	3	10.35
91500 - 9.d	185500	7500	170	270			17	11	337.2	6.8	1218000	20000	2.28	0.42			6.21	0.42	0.027	0.024	0.63	0.23	0.88	0.42	0.47	0.15	5.52	0.77	2.04	0.24	27.7	1.7	10.88	0.41	61.6	2.7	15.82	0.76	159	5.7	33	1.3	14260	240			133.3	3.8	11.47
91500 - 10.d	182900	6000					8.4	8.7	329.3	9.4	1233000	27000	2.43	0.44			6.13	0.35	0.025	0.026	0.46	0.25	0.74	0.38	0.65	0.16	4.9	0.99	2.01	0.21	27.7	1.6	11.31	0.56	60.4	2.5	15.29	0.69	160	5.8	32.5	1.6	14580	350			133.8	3	10.69
UAE413_Hf - 2.d	149000	18000	730	180	170	600	16	19	5550	130	1066000	25000	27.8	3.1	0.035	0.033	80.5	7.8	0.148	0.044	3.84	0.91	10.2	1.8	2.78	0.47	73.1	6.4	28.8	1.9	438	20	180.5	6.8	891	28	194.9	5.4	1767	45	356	10	25890	580	9	4.7	90	10	5
UAE413_Hf - 3.d	184800	8300	488	91	160	320	11	11	3970	180	1132000	23000	13.8	1.3	0.022	0.027	25.4	1.7	0.249	0.058	5.6	1.1	13.9	1.9	2.73	0.36	77.1	5.2	27	1.5	359	20	131.1	6	611	25	127.8	5.1	1077	43	213.1	7.7	21700	340	5.5	4.4	34.9	2.2	2.2
UAE413_Hf - 4.d	177000	11000	730	160	20	440	17	12	3790	320	1101000	18000	29.9	3.5	0.147	0.084	49.8	7.4	0.162	0.048	3.27	0.8	9.4	1.4	2.1	0.37	63.3	6.1	23.5	2.5	328	32	124	12	600	53	126	10	1063	83	209	14	21440	400	7.3	4.9	38.6	3.7	2.18
UAE413_Hf - 5.d	164000	12000	1710	150	630	640	144	97	9910	410	1084000	21000	126.3	7.2	0.28	0.13	97	4.6	0.381	0.088	4.61	0.82	14.6	1.2	3.15	0.37	125.5	4.4	54.3	1.9	822	34	334	14	1684	72	362	15	3130	120	614	24	26870	450	11.3	3.8	271	12	17.3
UAE413_Hf - 6.d	130000	19000	1480	230	720	660	9	17	7320	150	1090000	19000	67.8	4	0.28	0.13	72	2.3	0.3	0.1	3.37	0.89	10.8	1.5	3.8	0.51	87.7	5	38.3	1.1	588	13	237.7	6	1216	35	265.7	8.3	2408	88	493	22	29330	860	15.4	7.5	128	13	7.7
UAE388_Hf - 1.d	160000	10000	1400	190	390	390	2.2	9.6	6130	470	1122000	15000	21.9	3.3	1.07	0.16	75	7.2	0.75	0.11	6.69	0.89	14.5	1.4	7.26	0.77	94	9.5	36.7	2.9	517	43	197	16	979	79	209	16	1860	140	384	26	22190	490	17.7	5.6	94	13	5.3
UAE410_Hf - 2.d	113000	16000	1810	270	160	790	36	26	6330	240	1121000	26000	17.2	1.9	0.91	0.48	71.6	4	0.73	0.27	9.3	2.2	17.6	2.4	6.83	0.85	123.9	9	44.5	2.7	588	29	204	11	904	47	182.2	7.9	1511	77	294	17	25240	660	47	11	41.6	3.8	2.88
14-25_Hf - 3.d	173900	9900	790	140	410	480	32	14	4230	130	1118000	23000	33.1	1.7	0.044	0.035	108.6	4.1	0.225	0.045	4.08	0.73	10.1	1.2	1.63	0.29	66.9	3.5	24	1.1	346	15	134.8	5.7	677	25	146.5	5.6	1323	51	263.3	9.9	23470	400	0.8	3.3	37.1	1.7	2.05
14-25_Hf - 7.d	172000	12000	1250	150			15	13	5750	140	1133000	23000	24.1	2.2	0.118	0.077	98.8	4	0.187	0.057	3.92	0.57	11.6	1.3	4.74	0.5	83.9	4.1	32.3	1	472	10	189.9	3.8	965	20	203.9	4.3	1828	34	378.5	8.1	22670	500			35.6	3.7	1.5
14-25_Hf - 8.d	160500	8400	1350	190	350	520	19	12	4504	90	1165000	17000	7.93	0.88	0.012	0.022	160	20	0.138	0.048	3.12	0.69	9.8	1.5	4.72	0.61	66.1	2.9	24.72	0.91	358	10	144.6	2.9	731	14	157.6	3	1450	34	306.4	7.1	25510	390	2.4	4.2	16.6	1.7	1.19
14-25_Hf - 9.d	188900	8800	1710	170	10	350	15	12	5808	82	1137000	17000	15.8	1.7	0.012	0.022	42	2.2	0.147	0.037	2.77	0.54	10	1.5	3.39	0.38	77	3.7	30.06	0.74	468.9	7.9	196	3.3	1031	20	227.8	4.8	2089	58	449	14	24700	560	2.5	3.5	24.4	1.3	1.14
14-29_Hf - 1.d	183000	11000	4220	190	70	410	1	8.5	17530	590	1124000	21000	83	6.9	0.074	0.062	151	10	0.184	0.055	4.86	0.91	19.6	2.2	5.9	0.63	187.3	9.3	84	3.5	1332	49	572	23	2940	110	646	20	5870	200	1191	39	27430	510	2.3	4.4	199.1	7.1	10.77
13-24_Hf - 1.d	150000	13000	9080	570	360	360	5	11	41500	1200	1049000	17000	181.4	6.1	1.95	0.61	178.6	4.6	1.84	0.28	27.9	2.6	89.1	5	12.34	0.7	679	25	274.3	8.8	3780	110	1395	36	6360	160	1263	30	10520	210	1945	42	27630	450	1.8	4.6	2610	130	141.4
13-19_Hf - 2.d	66000	28000	2350	380			6	33	8860	220	1202000	30000	25.7	6.8	1.35	0.78	80	22	1.68	0.71	8.4	2.1	21.5	4.7	6.5	1.6	115.8	7.4	47.5	2.4	654	38	269	16	1360	100	299	21	2710	200	566	45	21100	1500	2	12	257	13	16.1
13-19_Hf - 3.d	127000	13000	2780	340	330	700	26	21	9950	370	1123000	17000	57.6	3.5	148	52	400	110	40	15	136	44	46.9	7.9	9.21	0.89	146	10	55.4	2.5	787	30	323	12	1687	70	380	14	3670	160	780	36	24260	510	32.6	8.7	342	18	44.6
13-19_Hf - 4.d	30000	19000	3950	590			1	59	17590	840	1108000	59000	105	18	5.5	3.9	200	110	4	1.9	27	11	44.8	8.4	6	1.7	235	25	95.8	9.8	1340	170	512	58	2560	390	530	49	4680	510	935	94	21800	3300	17	23	480	56	42.7
14-09_Hf - 1.d	167000	12000	3410	300	20	400	4	12	18900	480	1107000	19000	403	13	0.025	0.031	273.8	5.8	0.165	0.051	3.88	0.81	21.9	2.7	6.25	0.51	205.4	7.2	93.6	2.3	1449	33	609	14	3187	84	711	18	6540	170	1326	31	30430	510	2.1	5.1	404.8	8.2	20.2
14-09_Hf - 2.d	169000	11000	4360	260			7	12	16360	360	1133000	22000	61.9	2.7	0.053	0.039	145.7	4.6	0.213	0.065	5.27	0.91	20.1	1.6	6.58	0.59	186.1	7.2	80.1	2	1243	30	524	13	2738	68	600	13	5510	130	1126	25	26010	560			175.9	5.4	9.19
14-09_Hf - 3.d	167000	11000	4780	310	20	470	7.7	9.9	18160	510	1107000	19000	204	25	3.4	1.2	192	12	0.52	0.1	5.72	0.96	19.4	1.9	6.53	0.71	187.3	8.2	87.4	2.9	1366	40	585	17	3077	84	690	19	6320	170	1278	32	28500	540	6	4.2	275	16	14.8
14-09_Hf - 6.d	159500	9900	4060	290			15	14	16630	DR8	1124000	20000	246.2	7.8	330	150	790	270	59	26	225	98	54	15	6.18	0.88	205	12	85.8	2.8	1289	31	543	12	2795	52	614	12	5660	130	1140	18	31000	530	2.4	4.7	336.8	9.6	17.4
14-09_Hf - 7.d	94000	15000	4090	430					15360	550	1117000	28000	149.1	9.1	0.066	0.065	153.4	5.4	0.178	0.09	4.21	0.93	14.8	2	4.1	0.77	162.5	7.4	70.6	2.5	1149	41	477	16	2482	74	551	15	5140	200	1033	39	29150	830	1.6	7.9	231	11	13.7
14-09_Hf - 8.d	111700	9200	3980	490	360	750			15010	230	1127000	22000	129.5	7.2	0.056	0.049	156.1	6.6	0.132	0.065	3.42	0.8	16.6	1.9	4.81	0.51	161	6.6	73.3	1.9	1131	25	483.1	7.5	2528	42	559	10	5170	88	1063	22	29490	580	1	5.6	255.2	7.2	12.9
14-09_Hf - 10.d	120500	9600	3330	250			8	12	14530	300	1143000	22000	195.1	6	20	17	330	44	8.7	6.3	31	14	27.8	3.8	17.9	2	178.2	7	75.2	2.5	1155	27	474	11	2447	48	545	12	5090	120	1041	24	31650	600	3.9	6.4	323.1	7.1	17.2
14-09_Hf - 11.d	171000	11000	3990	330			7.8	9.2	18320	310	1120000	19000	304.9	6	0.137	0.052	249.6	5	0.265	0.051	5.46	0.86	21.1	2	6.44	0.59	211.8	6.6	95.7	2.2	1448	28	599.3	9.8	3108	55	685	12	6330	110	1277	26	30510	570	1.4	4.1	431	12	21.5
14-09_Hf - 12.d	183100	8800	3320	240	400	370	15	10	14620	690	1156000	18000	231	16	0.101	0.038	222	10	0.269	0.055	5.05	0.87	17.9	1.9	5.38	0.4	170	10	76.1	3.9	1149	59	478	23	2450	120	541	24	4920	250	990	45	31230	400	4.5	3.9	298	12	15.6
14-09_Hf - 13.d	124000	11000	3870	380	260	600	20	15	17500	330	1141000	18000	280.4	8.5	2.37	0.28	231.3	6.6	1.25	0.19	8.4	1.4	19.5	2.3	16.4	1.6	184.1	8.4	85.3	2.4	1339	24	560	11	2925	56	668	12	6250	110	1292	19	31520	620	3	5.8	375.4	9.2	20.8
14-09_Hf - 15.d	122000	9600	2970	300	150	490	10	16	9840	240	1118000	20000	92.4	3.2	2.04	0.22	143.9	4.4	1.71	0.25	9.9	1.8	14.4	2.3	10.2	1	105.6	5	51.1	1.7	779	20	318.7	8.9	1678	38	395.3	9.8	3790	110	769	22	33300	620	3.5	5.7	232	12	14.8
14-25_Hf - 11.d	180300	8100	1560	210			24	18	3867	79	1211000	22000	7.09	0.77	0.049	0.031	33.2	2.6	0.088	0.03	2.7	0.53	7.6	1.3	3.17	0.38	58.6	3.1	22.6	1	310	7	123.4	2.8	608	17	131	4.6	1250	46	266	11	26550	550	2.9	3.9	16.5	1.7	0.98
14-25_Hf - 12.d	175200	8900	980	180	370	420	15	11	3631	65	1159000	18000	9.91	0.87	0.125	0.041	35.2	1	0.113	0.04	2	0.48	5.04	0.96	1.43	0.18	38.8	2.2	15.92	0.63	245.4	6.3	106.9	2.1	598	11	143.9	3.3	1444	35	325.2	5.1	20900	320	0.8	3.5	43.4	1.4	2.26
14-25_Hf - 14.d	154900	8300	2810	260	220	540	25	15	11890	450	1162000	18000	69	5.7	0.346	0.09	386	19	1.49	0.16	21.1	1.3	42.2	3	5.96	0.48	223	10	78.3	3.1	1050	38	386	13	1832	63	376	12	3240	100	623	20	24440	380	1.4	5.2	102.4	3.5	5.53
14-25_Hf - 15.d	120600	7200	2400	390			26	18	6940	390	1163000	20000	41.4	2.9	0.094	0.07	126.9	5.5	0.212	0.078	3.57	0.81	9.4	1.9	1.79	0.41	79.7	6.9	34.7	2.3	538	33	218	13	1154	68	268	16	2600	150	507	27	27720	530	10.7	5.9	70	5.2	3.54
14-29_Hf - 2.d	165000	11000	1810	220	390	470	28	16	10040	220	1185000	21000	25.9	2.4	0.042	0.039	65.3	3.4	0.3	0.072	7.7	1.3	21.8	2.1	9.39	0.79	174.7	5.2	63.2	1.5	893	21	349.4	8.4	1706	41	358.2	9.5	3251	84	658	14	21180	360	4.2	3.6	20.1	1.4	0.9
14-19_Hf - 1.d	159400	6600	4220	330			11	11	14400	560	1194000	23000	62.6	3.1	0.251	0.097	138.5	6.9	0.272	0.076	5.7	1.2	17.5	2	6.01	0.7	160.6	6.6	69.8	3.4	1095	47	460	20	2400	100	530	20	5000	200	996	38	31200	760	11.4	5.1	159.2	5.9	11.3
14-19_Hf - 5.d	149000	13000	4520	370			10	11	12970	680	1148000	24000	70.4	4	1.98	0.35	117	12	1.25	0.16	11.7	2.3	20.2	3.7	10.3	1.1	150	16	64.1	4.8	986	67	407	24	2150	100	486	20	4620	160	950	31	30090	620	2.8	3.7	165.6	6.2	10
14-04_Hf - 1.d	50000	11000	4000	1100	300	2800			11350	610	1056000	48000	64.6	5.9	0.23	0.18	93.5	5.4	0.07	0.13	2	1.4	11.4	3.3	3.9	1.1	109	12	50.7	3.4	784	54	330	21	1790	110	402	24	3890	200	765	44	26100	1500	15	17	131.3	8.4	7.6
14-04_Hf - 2.d	101000	14000	4450	620	600	830	6	21	13700	650	1139000	24000	52.3	3.2	1.1	0.22	111.1	4.6	1.02	0.19	8.2	1.8	17.1	2.4	1.86	0.37	130.7	7.6	60.4	3.7	986	47	419	19	2240	100	521	22	5160	210	1128	44	23480	560	6.1	6.9	572	24	34.4
13-24_Hf - 3.d	164000	12000	1910	320	160	600	13	12	5350	170	1117000	22000	14.8	1.3	0.71	0.16	23.4	1.5	0.61	0.18	7.4	1.7	12.3	2.8	2.23	0.3	77.1	7.3	30.4	1.7	442	17	173.5	4.7	887	25	196.6	5.4	1886	51	391	11	18730	440	1.9	3.1	210.9	9.8	11
13-24_Hf - 4.d	145000	12000	2690	390	300	460	2	12	8440	210	1132000	21000	28.5	1.8	4.96	0.72	79.5	2.5	2.77	0.43	15.4	2.3	17.2	1.7	7.49	0.8	123.8	4.9	47.6	1.4	691	16	274.1	6.4	1400	35	309.7	7.4	2970	71	616	17	20340	380	10	4.9	399.7	8.6	23.3
[truncated: 7 more columns]

[truncated: 1 more sheets: DR9]
